# Supplementary material for: Psychosocial work exposures and health outcomes: a meta-review of 72 literature reviews with meta-analysis
Source: PubMed Central journal article supplement (PMC8504166; doi:10.5271/sjweh.3968), 2021-09-30
Supplement: SJWEH-47-489-S001.pdf [file SJWEH-47-489-S001.pdf]

# **Psychosocial work exposures and health outcomes: a meta-review of literature reviews with meta-analysis<sup>1</sup>**

by Isabelle Niedhammer, PhD,<sup>2</sup> Sandrine Bertrais, PhD, Katrina Witt, DPhil

<sup>1</sup> Supplementary material

<sup>2</sup> Correspondence to: Isabelle Niedhammer, INSERM, Univ Angers, Univ Rennes, EHESP, Irset (Institut de recherche en santé, environnement et travail) - UMR\_S 1085, ESTER Team, Angers, France [E-mail: [isabelle.niedhammer@inserm.fr](mailto:isabelle.niedhammer@inserm.fr)]

Appendix 1. List of keywords used in the search strategy

Appendix 2. Quality assessment of literature reviews and IPD-Work consortium studies

Supplementary Table S1 (part 1). Description of the included reviews

Supplementary Table S1 (part 2). Description of the included reviews

Supplementary Table S2. Quality assessment of the included reviews

Supplementary Table S3. Full-text articles excluded and reason for exclusion

Appendix 1. List of keywords used in the search strategy

|     |    |                                      | <b>Keywords</b>                                                                                                |
|-----|----|--------------------------------------|----------------------------------------------------------------------------------------------------------------|
|     |    | Meta-analysis                        | Meta-analysis, metaanalysis, meta-analyses, metaanalyses, meta-analytic, metaanalytic, pooled                  |
| AND |    | Work environment                     | Work*, occupation*, job, employ*                                                                               |
| AND |    | All psychosocial work factors        | Psychosocial, stress*                                                                                          |
|     | OR | Job strain model                     | Strain, demand*, control, latitude, support, influence, development, discretion, authority, freedom, relation* |
|     | OR | Long working hours                   | Hour*, time, overtime, overwork                                                                                |
|     | OR | Effort-reward imbalance model        | Effort, reward*, imbalance, esteem, respect, promotion                                                         |
|     | OR | Job insecurity, temporary employment | Secur*, insecur*, precar*, temporary                                                                           |
|     | OR | Workplace bullying                   | Bullying, harassment, violence*, conflict*, mobbing                                                            |
|     | OR | Organizational injustice             | Injustice, justice                                                                                             |
|     | OR | Quality of leadership                | Leadership                                                                                                     |
|     | OR | Work-family conflict                 | Conflict*, imbalance                                                                                           |
|     | OR | Role stressors                       | Role                                                                                                           |
|     | OR | Predictability                       | Predictability                                                                                                 |

All keywords were used for search in the titles and keywords related to meta-analysis were also used for search in the abstracts

## Appendix 2. Quality assessment of literature reviews and IPD-Work consortium studies

### 8 critical points

- 1) systematic literature review (without/with guidelines)
- 2) study design (prospective design mainly, prospective design only)
- 3) adjustment (close adjustment, expected adjustment)
- 4) quality assessment of primary studies and/or evidence (one assessment only, both)
- 5) appropriate statistical methods for meta-analysis (fixed effects model without checked conditions, random effects model)
- 6) subgroup and/or sensitivity analysis (gender analysis in studies among both genders, analysis in addition to gender analysis)
- 7) heterogeneity (study of, low heterogeneity i.e. <50%)
- 8) publication bias (study of, no publication bias)

low quality

moderate quality

high quality

or 0-1-2 for each point/criterion

∅ not applicable (for criteria 1, 4, and 8 in the case of IPD-Work consortium studies without literature review)

Overall score 0 (lowest score)-16 (highest score)

A weighted score was calculated for IPD-Work consortium studies without literature review (weight of 8/5)

Low scores: 0-7

Moderate scores: 8-11

High scores: 12-16

Nota Bene: IPD-Work consortium studies without literature review were underlined in yellow in Supplementary Table S1 and a \* was added to their quality assessment to indicate that only 5 criteria among 8 were rated.

Supplementary Table S1 (part 1). Description of the included reviews

|                                       | Publication date | Ref number | Review / guidelines         | Design(s) of primary studies                                            | Other inclusion criteria                                                                                                                      | Number of primary studies | Outcome(s)                                 | Exposure(s)                                                                                                                                                                                      | Main results: Pooled estimate(s) (95% CI)                                                                                                                                                                                                                                                                                                                                        |
|---------------------------------------|------------------|------------|-----------------------------|-------------------------------------------------------------------------|-----------------------------------------------------------------------------------------------------------------------------------------------|---------------------------|--------------------------------------------|--------------------------------------------------------------------------------------------------------------------------------------------------------------------------------------------------|----------------------------------------------------------------------------------------------------------------------------------------------------------------------------------------------------------------------------------------------------------------------------------------------------------------------------------------------------------------------------------|
| Amiri                                 | 2020             | 14         | Literature review<br>PRISMA | Longitudinal                                                            | Before Jan. 2019                                                                                                                              | 21                        | Musculoskeletal pain                       | Job strain (21 studies)                                                                                                                                                                          | 1.62 (1.22-2.15), heterogeneity: I <sup>2</sup> =91.6%                                                                                                                                                                                                                                                                                                                           |
| Aronsson<br><br>Not in the extraction | 2017             | 15         | Literature review<br>PRISMA | Prospective, case control, randomized intervention                      | 1990-Aug. 2013<br>Western world (Europe, North America, Australia and New Zealand)<br>n>100<br>Results controlled for at least age and gender | 25                        | Burnout (emotional exhaustion)             | Low control (9 studies)<br>Job demands (11 studies)<br>Low support (7 studies)<br>Injustice (3 studies)<br>Low reward (2 studies)<br>Job insecurity (3 studies)<br>Emotional demands (5 studies) | Adjusted for at least age and gender :<br>1.63 (1.53-1.75)<br>2.53 (2.36-2.71)<br>1.81 (1.68-1.95)<br>2.86 (2.22-3.70)<br>1.86 (1.37-2.52)<br>1.39 (1.22-1.57)<br>2.95 (2.40-3.62)                                                                                                                                                                                               |
| Babu                                  | 2014             | 16         | Literature review<br>PRISMA | Cohort, case-control                                                    | 1908-Jan. 2012                                                                                                                                | 9                         | Hypertension (blood pressure >140/90 mmHg) | Job strain (9 studies)                                                                                                                                                                           | 1.29 (1.14-1.47), heterogeneity: I <sup>2</sup> =78%                                                                                                                                                                                                                                                                                                                             |
| Bonde                                 | 2013             | 17         | Literature review           | Prospective cohort, retrospective cohort, case-control, cross-sectional | 1966-June 2012<br>Peer-reviewed studies<br>English language                                                                                   | 10                        | Miscarriage                                | Long working hours ≥40–52 hours a week (10 studies)                                                                                                                                              | 1.36 (1.25–1.49), heterogeneity: Q=22.2, p=0.020                                                                                                                                                                                                                                                                                                                                 |
| Bonzini                               | 2007             | 18         | Literature review           | Cohort, case-control, cross-sectional                                   | 1966-Dec. 2005<br>Abstract in English                                                                                                         | 8                         | Preterm delivery                           | Long working hours ≥40 hours a week (8 studies)                                                                                                                                                  | 1.31 (1.16-1.47), heterogeneity: Q=4.33, p=0.74                                                                                                                                                                                                                                                                                                                                  |
| Cai                                   | 2019             | 19         | Literature review<br>PRISMA | All designs (except case studies and reviews)                           | Before March 2019                                                                                                                             | 59                        | Pregnancy outcomes                         | Long working hours ≥40 hours a week                                                                                                                                                              | --- Preterm delivery (25 studies):<br>1.21 (1.11-1.33), heterogeneity: I <sup>2</sup> =30%<br>--- Miscarriage (8 studies):<br>1.38 (1.08-1.77), heterogeneity: I <sup>2</sup> =73%<br>--- Preeclampsia (5 studies):<br>1.27 (0.74-2.19), heterogeneity: I <sup>2</sup> =84%<br>--- Gestational hypertension (5 studies):<br>0.99 (0.72-1.37), heterogeneity: I <sup>2</sup> =62% |

|          | Publication date | Ref number | Review / guidelines                             | Design(s) of primary studies          | Other inclusion criteria                                 | Number of primary studies | Outcome(s)                                          | Exposure(s)                                                                                                                                                 | Main results: Pooled estimate(s) (95% CI)                                                                                                                                                                                                                                                                                                                                                                                                                                                                                                                                                                                                                                                        |
|----------|------------------|------------|-------------------------------------------------|---------------------------------------|----------------------------------------------------------|---------------------------|-----------------------------------------------------|-------------------------------------------------------------------------------------------------------------------------------------------------------------|--------------------------------------------------------------------------------------------------------------------------------------------------------------------------------------------------------------------------------------------------------------------------------------------------------------------------------------------------------------------------------------------------------------------------------------------------------------------------------------------------------------------------------------------------------------------------------------------------------------------------------------------------------------------------------------------------|
|          |                  |            |                                                 |                                       |                                                          |                           |                                                     |                                                                                                                                                             | --- Small for gestational age (12 studies): 1.16 (1.00-1.36), heterogeneity: I <sup>2</sup> =57%<br>--- Low birth weight (6 studies): 1.43 (1.11-1.84), heterogeneity: I <sup>2</sup> =0%                                                                                                                                                                                                                                                                                                                                                                                                                                                                                                        |
| Cosgrove | 2012             | 20         | Literature review<br>MOOSE                      | Cohort, case-control, cross-sectional | Up to March 2010<br>English and non-English language     | 9                         | Type 2 diabetes                                     | Job demands (4 studies)<br>Low decision latitude (4 studies)<br>Job strain (4 studies)<br>Low social support (4 studies)<br>Long working hours (3 studies)  | Most adjusted models:<br>0.95 (0.81-1.09), heterogeneity: I <sup>2</sup> =0%, Cochran's Q-test p=NS<br>1.04 (0.86-1.21), heterogeneity: I <sup>2</sup> =12%, Cochran's Q-test p=NS<br>1.08 (0.84-1.32), heterogeneity: I <sup>2</sup> =39%, Cochran's Q-test p=NS<br>1.04 (0.88-1.20), heterogeneity: I <sup>2</sup> =0%, Cochran's Q-test p=NS<br>0.81 (-0.10-1.71), heterogeneity: I <sup>2</sup> =67%, Cochran's Q-test p<0.05                                                                                                                                                                                                                                                                |
| Descatha | 2020             | 21         | Literature review<br>Navigation Guide<br>PRISMA | Cohort, case-control                  | Up to May 2018, update in April 2020<br>English language | 22                        | Stroke (incidence, mortality)                       | Long working hours (reference group: 35-40 h/week)                                                                                                          | Adjusted for at least age, sex, and SES:<br>Working hours 41-48 h/week:<br>--- incidence (18 cohort studies): 1.04 (0.94-1.14), heterogeneity: I <sup>2</sup> =0%<br>--- mortality (12 cohort studies): 1.01 (0.91-1.12), heterogeneity: I <sup>2</sup> =0%<br>Working hours 49-54 h/week:<br>--- incidence (17 cohort studies): 1.13 (1.00-1.28), heterogeneity: I <sup>2</sup> =0%<br>--- mortality (11 cohort studies): 1.13 (0.99-1.29), heterogeneity: I <sup>2</sup> =0%<br>Working hours ≥ 55 h/week:<br>--- incidence (7 cohort studies): 1.35 (1.13-1.61), heterogeneity: I <sup>2</sup> =3%<br>--- mortality (10 cohort studies): 1.08 (0.89-1.31), heterogeneity: I <sup>2</sup> =20% |
| Dragano  | 2017             | 22         | IPD-Work Consortium                             | Cohort                                |                                                          | 11                        | Coronary heart disease                              | Effort-reward imbalance (ERI)                                                                                                                               | Adjusted for age, sex and SES:<br>1.19 (1.04-1.38)                                                                                                                                                                                                                                                                                                                                                                                                                                                                                                                                                                                                                                               |
| Duchaine | 2020             | 23         | Literature review<br>PRISMA<br>MOOSE            | Prospective                           | 1946-Oct. 2017, update in Feb. 2019                      | 13                        | Sickness absence due to a diagnosed mental disorder | Job strain (8 studies)<br>Psychological demands (7 studies)<br>Low job control (5 studies)<br>Low social support (9 studies)<br>Effort-reward imbalance (3) | Adjusted for age, sex, and SES or most of them:<br>1.47 (1.24-1.74), heterogeneity: I <sup>2</sup> =58%<br>1.23 (1.04-1.45), heterogeneity: I <sup>2</sup> =56%<br>1.25 (1.02-1.53), heterogeneity: I <sup>2</sup> =72%<br>1.12 (0.99-1.26), heterogeneity: I <sup>2</sup> =45%<br>1.66 (1.37-2.00), heterogeneity: I <sup>2</sup> =34%                                                                                                                                                                                                                                                                                                                                                          |

|          | Publication date | Ref number | Review / guidelines | Design(s) of primary studies                                           | Other inclusion criteria   | Number of primary studies | Outcome(s)                                                                                     | Exposure(s)                                                                                         | Main results: Pooled estimate(s) (95% CI)                                                                                                                                                                                                                                                                                                                                                                                                                                                                                       |
|----------|------------------|------------|---------------------|------------------------------------------------------------------------|----------------------------|---------------------------|------------------------------------------------------------------------------------------------|-----------------------------------------------------------------------------------------------------|---------------------------------------------------------------------------------------------------------------------------------------------------------------------------------------------------------------------------------------------------------------------------------------------------------------------------------------------------------------------------------------------------------------------------------------------------------------------------------------------------------------------------------|
|          |                  |            |                     |                                                                        |                            |                           |                                                                                                | studies)<br>Low reward (3 studies)                                                                  | 1.76 (1.49-2.08), heterogeneity: I <sup>2</sup> =0%                                                                                                                                                                                                                                                                                                                                                                                                                                                                             |
| Ferrie   | 2016             | 24         | IPD-Work Consortium | Prospective cohort                                                     |                            | 19                        | Diabetes                                                                                       | Job insecurity                                                                                      | Adjusted for age, sex and SES (15 studies):<br>1.15 (1.04–1.28)                                                                                                                                                                                                                                                                                                                                                                                                                                                                 |
| Fransson | 2012             | 25         | IPD-Work Consortium | Cross-sectional and longitudinal analyses based on prospective cohorts |                            | 14                        | Leisure-time physical inactivity                                                               | High strain, passive and active job (reference group: low strain)                                   | Cross-sectional associations adjusted for sex and age (14 studies):<br>--- high strain 1.36 (1.25-1.48)<br>--- passive job 1.34 (1.23-1.47)<br>--- active job 1.00 (0.93-1.06)<br>Prospective associations adjusted for sex, age, SES and smoking (6 studies):<br>--- high strain 1.21 (1.11-1.32)<br>--- passive job 1.20 (1.11-1.30)<br>--- active job 1.07 (0.99-1.15)                                                                                                                                                       |
| Fransson | 2015             | 26         | IPD-Work Consortium | Prospective cohort                                                     |                            | 14                        | Stroke (overall, ischemic, hemorrhagic)                                                        | Job strain                                                                                          | Age- and sex-adjusted results:<br>--- overall stroke (14 studies):<br>1.09 (0.94-1.26), heterogeneity: I <sup>2</sup> =21.6%<br>Age-, sex- and SES-adjusted results:<br>--- ischemic stroke (13 studies):<br>1.18 (1.00-1.39)<br>--- hemorrhagic stroke (12 studies):<br>0.95 (0.72-1.27)                                                                                                                                                                                                                                       |
| Hauke    | 2011             | 27         | Literature review   | Longitudinal                                                           | 2000-2009 English language | 47                        | Musculoskeletal disorders (all body regions)<br>Neck/shoulder<br>Upper extremities<br>Low back | Low social support<br>High job demands<br>Low job control<br>High job strain<br>High job insecurity | The most adjusted models:<br>All body regions:<br>- Low social support (40 studies, 51 estimates): 1.16 (1.10-1.23)<br>- High job demands (42 studies, 43 estimates): 1.19 (1.11-1.29)<br>- Low job control (23 studies, 26 estimates): 1.21 (1.10-1.32)<br>- High job strain (14 studies, 22 estimates): 1.35 (1.22-1.50)<br>- High job insecurity (4 studies, 4 estimates): 1.12 (0.87-1.45)<br><br>Low back:<br>- Low social support (13 estimates): 1.22 (1.07-1.38)<br>- High job demands (13 estimates): 1.34 (1.15-1.58) |

|                                       | Publication date | Ref number | Review / guidelines | Design(s) of primary studies | Other inclusion criteria | Number of primary studies | Outcome(s)                                              | Exposure(s)                                        | Main results: Pooled estimate(s) (95% CI)                                                                                                                                                                                                                                                                                                                                                                                                                                                                                                                                                                                                                             |
|---------------------------------------|------------------|------------|---------------------|------------------------------|--------------------------|---------------------------|---------------------------------------------------------|----------------------------------------------------|-----------------------------------------------------------------------------------------------------------------------------------------------------------------------------------------------------------------------------------------------------------------------------------------------------------------------------------------------------------------------------------------------------------------------------------------------------------------------------------------------------------------------------------------------------------------------------------------------------------------------------------------------------------------------|
|                                       |                  |            |                     |                              |                          |                           |                                                         |                                                    | - Low job control (8 estimates): 1.37 (1.01-1.84)<br>- High job strain (4 estimates): 1.40 (1.10-1.80)<br>- High job insecurity (2 estimates): 0.85 (0.43-1.69)<br><br>Neck/shoulder:<br>- Low social support (20 estimates): 1.15 (1.05-1.26)<br>- High job demands (16 estimates): 1.11 (0.97-1.27)<br>- Low job control (11 estimates): 1.16 (1.05-1.29)<br>- High job strain (13 estimates): 1.43 (1.25-1.62)<br><br>Upper extremities:<br>- Low social support (15 estimates): 1.18 (1.06-1.32)<br>- High job demands (12 estimates): 1.18 (1.06-1.32)<br>- Low job control (5 estimates): 1.24 (1.00-1.54)<br>- High job strain (5 estimates): 1.09 (0.85-1.39) |
| Heikkila<br><br>Not in the extraction | 2016             | 28         | IPD-Work Consortium | Prospective cohort           |                          | 14                        | Cancer (any cancer, colorectal, lung, breast, prostate) | Long working hours (reference group: 35-40 h/week) | Age- and sex- adjusted results:<br>Working hours 41-48 h/week:<br>--- any cancer (12 studies): 0.97 (0.88-1.06), heterogeneity: I <sup>2</sup> =2.4%<br>--- colorectal cancer (10 studies): 1.01 (0.76-1.36), heterogeneity: I <sup>2</sup> =0%<br>--- lung cancer (10 studies): 0.84 (0.57-1.24), heterogeneity: I <sup>2</sup> =0%<br>--- breast cancer (10 studies): 0.96 (0.73-1.27), heterogeneity: I <sup>2</sup> =19.1%<br>--- prostate cancer (9 studies): 0.95 (0.76-1.19), heterogeneity: I <sup>2</sup> =0%<br>Working hours 49-54 h/week:<br>--- any cancer (11 studies):                                                                                 |

|          | Publication date | Ref number | Review / guidelines | Design(s) of primary studies | Other inclusion criteria | Number of primary studies | Outcome(s)                                              | Exposure(s) | Main results: Pooled estimate(s) (95% CI)                                                                                                                                                                                                                                                                                                                                                                                                                                                                                                                                                                                                                                                                                                                                                                                                                                                                                                |
|----------|------------------|------------|---------------------|------------------------------|--------------------------|---------------------------|---------------------------------------------------------|-------------|------------------------------------------------------------------------------------------------------------------------------------------------------------------------------------------------------------------------------------------------------------------------------------------------------------------------------------------------------------------------------------------------------------------------------------------------------------------------------------------------------------------------------------------------------------------------------------------------------------------------------------------------------------------------------------------------------------------------------------------------------------------------------------------------------------------------------------------------------------------------------------------------------------------------------------------|
|          |                  |            |                     |                              |                          |                           |                                                         |             | 1.09 (0.97-1.23), heterogeneity: I <sup>2</sup> =0%<br>--- colorectal cancer (8 studies):<br>1.59 (0.96-2.61), heterogeneity: I <sup>2</sup> =27.5%<br>--- lung cancer (5 studies):<br>0.70 (0.35-1.41), heterogeneity: I <sup>2</sup> =0%<br>--- breast cancer (9 studies):<br>0.99 (0.62-1.57), heterogeneity: I <sup>2</sup> =15.4%<br>--- prostate cancer (10 studies):<br>1.54 (1.07-2.22), heterogeneity: I <sup>2</sup> =29.0%<br>Working hours ≥ 55 h/week:<br>--- any cancer (10 studies):<br>0.93 (0.81-1.06), heterogeneity: I <sup>2</sup> =0%<br>--- colorectal cancer (7 studies):<br>1.05 (0.56-1.97), heterogeneity: I <sup>2</sup> =37.9%<br>--- lung cancer (7 studies):<br>0.62 (0.33-1.16), heterogeneity: I <sup>2</sup> =0%<br>--- breast cancer (6 studies):<br>1.54 (1.09-2.18), heterogeneity: I <sup>2</sup> =0%<br>--- prostate cancer (9 studies):<br>1.18 (0.72-1.92), heterogeneity: I <sup>2</sup> =35.9% |
| Heikkila | 2013             | 29         | IPD-Work Consortium | Prospective cohort           |                          | 12                        | Cancer (any cancer, colorectal, lung, breast, prostate) | Job strain  | Age- and sex- adjusted results:<br>--- any cancer (12 studies):<br>0.95 (0.88-1.02), heterogeneity: I <sup>2</sup> =0%<br>--- colorectal cancer (12 studies):<br>1.11 (0.87-1.41), heterogeneity: I <sup>2</sup> =0%<br>--- lung cancer (12 studies):<br>1.32 (1.01-1.74), heterogeneity: I <sup>2</sup> =0%<br>--- breast cancer (11 studies):<br>0.93 (0.79-1.10), heterogeneity: I <sup>2</sup> =0%<br>--- prostate cancer (10 studies):<br>0.83 (0.66-1.05), heterogeneity: I <sup>2</sup> =0%                                                                                                                                                                                                                                                                                                                                                                                                                                       |
| Heikkila | 2020             | 30         | IPD-Work Consortium | Prospective cohort           |                          | 11                        | Hospital record of peripheral artery disease            | Job strain  | Age- and sex-adjusted:<br>1.46 (1.17-1.83), heterogeneity: I <sup>2</sup> =21.4%                                                                                                                                                                                                                                                                                                                                                                                                                                                                                                                                                                                                                                                                                                                                                                                                                                                         |
| Heikkila | 2012             | 31         | IPD-Work Consortium | Cross-sectional and          |                          | 15                        | Tobacco smoking                                         | Job strain  | Meta-analysis of cross-sectional associations adjusted for sex, age and                                                                                                                                                                                                                                                                                                                                                                                                                                                                                                                                                                                                                                                                                                                                                                                                                                                                  |

|          | Publication date | Ref number | Review / guidelines     | Design(s) of primary studies                                    | Other inclusion criteria | Number of primary studies | Outcome(s)                                                        | Exposure(s)                                                       | Main results: Pooled estimate(s) (95% CI)                                                                                                                                                                                                                                                                                                                                                                                                                                                                                                                                                                                                                                          |
|----------|------------------|------------|-------------------------|-----------------------------------------------------------------|--------------------------|---------------------------|-------------------------------------------------------------------|-------------------------------------------------------------------|------------------------------------------------------------------------------------------------------------------------------------------------------------------------------------------------------------------------------------------------------------------------------------------------------------------------------------------------------------------------------------------------------------------------------------------------------------------------------------------------------------------------------------------------------------------------------------------------------------------------------------------------------------------------------------|
|          |                  |            |                         | prospective analyses of prospective cohorts                     |                          |                           |                                                                   |                                                                   | SES (15 studies), with job strain as outcome:<br>--- non-smokers: reference category<br>--- ex smokers: 1.00 (0.93-1.06), heterogeneity: I <sup>2</sup> =69.3%<br>--- current smokers: 1.11 (1.03-1.18), heterogeneity: I <sup>2</sup> =67.8%<br>Prospective associations based on the pooled individual-level data, adjusted for sex, age and SES (6 studies), OR (95% CI) for being smoker at follow-up among baseline never- and ex-smokers:<br>--- job strain at baseline: 1.03 (0.87-1.21)                                                                                                                                                                                    |
| Heikkila | 2012             | 32         | IPD-Work Consortium     | Cross-sectional and prospective analyses of prospective cohorts |                          | 12                        | Alcohol intake                                                    | Job strain                                                        | Meta-analysis of cross-sectional associations adjusted for sex, age and SES (12 studies), with job strain as outcome:<br>--- non-drinkers: 1.10 (1.05-1.14), heterogeneity: I <sup>2</sup> =0.0%<br>--- moderate drinkers: reference category<br>--- intermediate drinkers: 0.92 (0.86-0.99), heterogeneity: I <sup>2</sup> =0.0%<br>--- heavy drinkers: 1.12 (1.00-1.26), heterogeneity: I <sup>2</sup> =61.9%<br>Prospective associations based on the pooled individual-level data, adjusted for sex, age and SES (4 studies), OR (95% CI) for becoming intermediate or heavy drinker among baseline moderate and non-drinkers:<br>--- job strain at baseline: 0.90 (0.79-1.01) |
| Heikkila | 2014             | 33         | IPD-Work Consortium     | Prospective cohort                                              |                          | 11                        | Inflammatory bowel diseases (Crohn's disease, ulcerative colitis) | Job strain                                                        | Age- and sex-adjusted:<br>--- Crohn's disease: 0.89 (0.52-1.52), heterogeneity: I <sup>2</sup> =0.0%<br>--- Ulcerative colitis: 1.14 (0.80-1.61), heterogeneity: I <sup>2</sup> =27.1%                                                                                                                                                                                                                                                                                                                                                                                                                                                                                             |
| Huang    | 2015             | 34         | Literature review MOOSE | Prospective cohort                                              | Up to July 2014          | 6                         | Stroke (overall, ischemic, hemorrhagic)                           | High strain, passive and active job (reference group: low strain) | All stroke (6 studies):<br>--- high strain: 1.22 (1.01-1.47), heterogeneity: I <sup>2</sup> =9%<br>--- passive job: 1.07 (0.90-1.28),                                                                                                                                                                                                                                                                                                                                                                                                                                                                                                                                              |

|                                       | Publication date | Ref number | Review / guidelines         | Design(s) of primary studies | Other inclusion criteria             | Number of primary studies | Outcome(s)                                                        | Exposure(s)                                                         | Main results: Pooled estimate(s) (95% CI)                                                                                                                                                                                                                                                                                      |
|---------------------------------------|------------------|------------|-----------------------------|------------------------------|--------------------------------------|---------------------------|-------------------------------------------------------------------|---------------------------------------------------------------------|--------------------------------------------------------------------------------------------------------------------------------------------------------------------------------------------------------------------------------------------------------------------------------------------------------------------------------|
|                                       |                  |            |                             |                              |                                      |                           |                                                                   |                                                                     | heterogeneity: I <sup>2</sup> =41%<br>--- active job: 1.01 (0.86-1.18), heterogeneity: I <sup>2</sup> =17%<br>Ischemic stroke (3 studies):<br>--- high strain: 1.58 (1.12-2.23), heterogeneity: I <sup>2</sup> =90%<br>Hemorrhagic stroke (2 studies):<br>--- high strain: 1.37 (0.73-2.58), heterogeneity: I <sup>2</sup> =9% |
| Kang                                  | 2012             | 35         | Literature review           | Cohort, case-control         | Up to Sept. 2011<br>English language | 11                        | Cardiovascular disease                                            | Long working hours ≥45–55 hours a week                              | 1.37 (1.11-1.70), heterogeneity: p=0.037                                                                                                                                                                                                                                                                                       |
| Kim                                   | 2016             | 36         | Literature review<br>MOOSE  | Prospective cohort           | Jan. 2005- Dec. 2014                 | 6                         | Depressive symptoms                                               | Job insecurity (6 studies)                                          | 1.29 (1.06–1.57), heterogeneity: I <sup>2</sup> =89%                                                                                                                                                                                                                                                                           |
| Kivimaki                              | 2013             | 37         | IPD-Work Consortium         | Prospective cohort           |                                      | 7                         | Coronary heart disease                                            | Job strain                                                          | Adjusted for age, sex, and cohort: 1.25 (1.06–1.47)                                                                                                                                                                                                                                                                            |
| Kivimaki<br>Update of Kivimaki E 2014 | 2015             | 38         | Literature review           | Prospective cohort           |                                      | 27                        | Coronary heart disease                                            | Job strain                                                          | 1.33 (1.19-1.49)                                                                                                                                                                                                                                                                                                               |
| Kivimaki<br>Idem Steptoe ARPH 2013    | 2014             | 39         | Literature review           | Prospective cohort           |                                      | 26                        | Coronary heart disease                                            | Job strain                                                          | 1.34 (1.18-1.51), heterogeneity: I <sup>2</sup> =21%                                                                                                                                                                                                                                                                           |
| Kivimaki<br>Not in the extraction     | 2018             | 40         | IPD-Work Consortium         | Prospective cohort           |                                      | 8                         | Venous thromboembolism (deep-vein thrombosis, pulmonary embolism) | Long working hours ≥55 hours a week (reference group: 35-40 h/week) | Adjusted for age, sex, cohort, and SES:<br>--- Venous thromboembolism: 1.5 (1.1-2.1)<br>--- Deep-vein thrombosis: 1.7 (1.1-2.5)<br>--- Pulmonary embolism: 1.4 (0.8-2.4)                                                                                                                                                       |
| Kivimaki                              | 2017             | 41         | IPD-Work Consortium         | Prospective cohort           |                                      | 8                         | Atrial fibrillation                                               | Long working hours                                                  | Adjusted for age, sex, and SES: 1.42 (1.13-1.80), heterogeneity: I <sup>2</sup> =0%                                                                                                                                                                                                                                            |
| Kivimaki                              | 2015             | 42         | Literature review<br>PRISMA | Cohort                       | Up to Aug 2014                       | 8                         | Weight gain<br>Obesity                                            | Job strain                                                          | Adjusted for age, sex and SES:<br>Weight gain (4 studies):<br>--- random-effect meta-analysis: 1.12 (0.99-1.28), heterogeneity: I <sup>2</sup> =48.4%                                                                                                                                                                          |

|          | Publication date | Ref number | Review / guidelines                                | Design(s) of primary studies | Other inclusion criteria                                       | Number of primary studies | Outcome(s)                                                                              | Exposure(s)                                                                                                        | Main results: Pooled estimate(s) (95% CI)                                                                                                                                                                                                                                                              |
|----------|------------------|------------|----------------------------------------------------|------------------------------|----------------------------------------------------------------|---------------------------|-----------------------------------------------------------------------------------------|--------------------------------------------------------------------------------------------------------------------|--------------------------------------------------------------------------------------------------------------------------------------------------------------------------------------------------------------------------------------------------------------------------------------------------------|
|          |                  |            |                                                    |                              |                                                                |                           |                                                                                         |                                                                                                                    | Obesity (4 studies):<br>--- random-effect meta-analysis:<br>1.01 (0.88-1.16), heterogeneity:<br>I <sup>2</sup> =18.3%                                                                                                                                                                                  |
| Kivimaki | 2012             | 43         | IPD-Work Consortium                                | Prospective cohort           |                                                                | 13                        | Coronary heart disease (fatal and non-fatal events)                                     | Job strain                                                                                                         | Adjusted for age, sex and SES (13 studies):<br>1.17 (1.05-1.31)                                                                                                                                                                                                                                        |
| Kivimaki | 2015             | 44         | Literature review<br>PRISMA<br>IPD-Work Consortium | Prospective cohort           | Up to Aug 2014<br>English language                             | 22 (CHD)<br>14 (Stroke)   | Coronary heart disease and stroke                                                       | Long working hours ≥55 hours a week (reference group: 35-40 h/week)                                                | Adjusted for age, sex, and SES:<br>--- coronary heart disease:<br>1.13 (1.02–1.26), heterogeneity: I <sup>2</sup> =0%<br>--- stroke:<br>1.33 (1.11–1.61), heterogeneity: I <sup>2</sup> =0%                                                                                                            |
| Kivimaki | 2015             | 45         | Literature review<br>PRISMA<br>IPD-Work Consortium | Prospective cohort           | Up to April 2014<br>English language                           | 23                        | Type 2 diabetes                                                                         | Long working hours ≥55 hours a week (reference group: 35-40 h/week)                                                | Adjusted for age and sex:<br>1.07 (0.89–1.27), heterogeneity: I <sup>2</sup> =53%                                                                                                                                                                                                                      |
| Kivimaki | 2006             | 46         | Literature review                                  | Prospective cohort           | Up to Jan. 2006                                                | 14                        | Coronary heart disease or cardiovascular mortality                                      | Job strain<br>Effort-reward imbalance<br>Organizational injustice                                                  | Age- and gender-adjusted:<br>--- job strain (10 studies):<br>1.45 (1.15–1.84), heterogeneity: Q=17.5, p=0.04<br>--- effort-reward imbalance (4 studies):<br>1.58 (0.84–2.97), heterogeneity: Q=3.9, p<0.05<br>--- organizational injustice (2 studies):<br>1.62 (1.24–2.13), heterogeneity: not tested |
| Kraatz   | 2013             | 47         | Literature review<br>PRISMA                        | Prospective longitudinal     | Up to May 2009<br>English or German language                   | 18                        | Neck and/or shoulder complaints or disorders (exclusion of injuries or malign diseases) | Job demands (9 studies)<br>Low job control (4 studies)<br>Low social support (6 studies)<br>Job strain (4 studies) | Adjusted for at least one physical factor:<br>1.28 (1.00-1.64), heterogeneity: I <sup>2</sup> =77%<br>1.64 (1.16-2.31), heterogeneity: I <sup>2</sup> =57%<br>1.33 (1.02-1.73), heterogeneity: I <sup>2</sup> =67%<br>3.73 (0.80-17.54), heterogeneity: I <sup>2</sup> =84%                            |
| Lang     | 2012             | 48         | Literature review                                  | Longitudinal                 | Up to Aug. 2009<br>Peer-reviewed articles<br>English or German | 50                        | Musculoskeletal problems                                                                | High job demands<br>Low job control<br>High job strain<br>Low social support<br>Low job security                   | Lower back:<br>High job demands (16 studies):<br>1.32 (1.13-1.53), heterogeneity:<br>I <sup>2</sup> =62.1%<br>Low job control (14 studies):                                                                                                                                                            |

|    | Publication date | Ref number | Review / guidelines | Design(s) of primary studies | Other inclusion criteria                                    | Number of primary studies | Outcome(s)              | Exposure(s)                                        | Main results:<br>Pooled estimate(s) (95% CI)                                                                                                                                                                                                                                                                                                                                                                                                                                                                                                                                                                                                                                                                                                                                                                                                                                                                                                                                                                                                                                                                                                                                                                                                                          |
|----|------------------|------------|---------------------|------------------------------|-------------------------------------------------------------|---------------------------|-------------------------|----------------------------------------------------|-----------------------------------------------------------------------------------------------------------------------------------------------------------------------------------------------------------------------------------------------------------------------------------------------------------------------------------------------------------------------------------------------------------------------------------------------------------------------------------------------------------------------------------------------------------------------------------------------------------------------------------------------------------------------------------------------------------------------------------------------------------------------------------------------------------------------------------------------------------------------------------------------------------------------------------------------------------------------------------------------------------------------------------------------------------------------------------------------------------------------------------------------------------------------------------------------------------------------------------------------------------------------|
|    |                  |            |                     |                              | language<br>Working populations in industrialized countries |                           |                         |                                                    | <p>1.30 (1.11-1.52), heterogeneity: I<sup>2</sup>=44.7%</p> <p>High job strain (13 studies): 1.38 (1.07-1.78), heterogeneity: I<sup>2</sup>=49.4%</p> <p>Low social support (14 studies): 1.42 (1.25-1.61), heterogeneity: I<sup>2</sup>=0.0%</p> <p>Low job security (8 studies): 1.43 (1.16-1.76), heterogeneity: I<sup>2</sup>=48.9%</p> <p>Neck and/or shoulder:</p> <p>High job demands (28 studies): 1.17 (1.10-1.24), heterogeneity: I<sup>2</sup>=18.6%</p> <p>Low job control (26 studies): 1.27 (1.17-1.38), heterogeneity: I<sup>2</sup>=4.3%</p> <p>High job strain (12 studies): 1.33 (1.08-1.62), heterogeneity: I<sup>2</sup>=46.0%</p> <p>Low social support (18 studies): 1.15 (1.05-1.27), heterogeneity: I<sup>2</sup>=2.3%</p> <p>Upper extremity:</p> <p>High job demands (8 studies): 1.18 (1.03-1.36), heterogeneity: I<sup>2</sup>=0.0%</p> <p>Low job control (9 studies): 1.33 (1.11-1.59), heterogeneity: I<sup>2</sup>=29.0%</p> <p>Low social support (7 studies): 1.23 (0.99-1.53), heterogeneity: I<sup>2</sup>=46.6%</p> <p>Lower extremity:</p> <p>Low job control (5 studies): 1.14 (0.74-1.78), heterogeneity: I<sup>2</sup>=58.3%</p> <p>Low social support (5 studies): 1.62 (1.20-2.18), heterogeneity: I<sup>2</sup>=12.6%</p> |
| Li | 2020             | 49         | Literature review   | Cohort studies               | Up to Aug. 2019                                             | 35                        | Ischaemic heart disease | Long working hours (reference group: 35-40 h/week) | Adjusted for at least age, sex, and SES:                                                                                                                                                                                                                                                                                                                                                                                                                                                                                                                                                                                                                                                                                                                                                                                                                                                                                                                                                                                                                                                                                                                                                                                                                              |

|                                     | Publication date | Ref number | Review / guidelines                                | Design(s) of primary studies                                 | Other inclusion criteria                                                          | Number of primary studies | Outcome(s)                                                                                            | Exposure(s)                                                                                                                                                                                                            | Main results: Pooled estimate(s) (95% CI)                                                                                                                                                                                                                                                                                                                                                                                                                                                                                                                                                                                                                               |
|-------------------------------------|------------------|------------|----------------------------------------------------|--------------------------------------------------------------|-----------------------------------------------------------------------------------|---------------------------|-------------------------------------------------------------------------------------------------------|------------------------------------------------------------------------------------------------------------------------------------------------------------------------------------------------------------------------|-------------------------------------------------------------------------------------------------------------------------------------------------------------------------------------------------------------------------------------------------------------------------------------------------------------------------------------------------------------------------------------------------------------------------------------------------------------------------------------------------------------------------------------------------------------------------------------------------------------------------------------------------------------------------|
|                                     |                  |            | Navigation Guide<br>PRISMA<br>GATHER               | (retrospective or prospective), case-control studies         |                                                                                   |                           | (incidence, mortality)                                                                                |                                                                                                                                                                                                                        | Working hours 41-48 h/week:<br>--- incidence (20 cohort studies):<br>0.98 (0.91-1.07), heterogeneity: I <sup>2</sup> =0%<br>--- mortality (13 cohort studies):<br>0.99 (0.88-1.12), heterogeneity: I <sup>2</sup> =8%<br>Working hours 49-54 h/week:<br>--- incidence (18 cohort studies):<br>1.05 (0.94-1.17), heterogeneity: I <sup>2</sup> =0%<br>--- mortality (11 cohort studies):<br>1.01 (0.82-1.25), heterogeneity: I <sup>2</sup> =13%<br>Working hours ≥ 55 h/week:<br>--- incidence (22 cohort studies):<br>1.13 (1.02-1.26), heterogeneity: I <sup>2</sup> =5%<br>--- mortality (16 cohort studies):<br>1.17 (1.05-1.31), heterogeneity: I <sup>2</sup> =0% |
| Linton<br><br>Not in the extraction | 2015             | 50         | Literature review<br>PRISMA                        | Prospective or randomized                                    | 1990-Oct.2012<br>English language                                                 | 22                        | Sleep disturbances                                                                                    | High demands (6 studies)<br>Low control (6 studies)<br>Job strain (4 studies)<br>Low social support (4 studies)<br>Organizational injustice (3 studies)<br>Effort-reward imbalance (3 studies)<br>Bullying (3 studies) | Least adjusted:<br>1.48 (1.28-1.72)<br>1.08 (0.89-1.28)<br>1.35 (1.17-1.56)<br>1.35 (1.11-1.64)<br>1.25 (1.00-1.56)<br><br>1.44 (0.98-2.11)<br><br>1.42 (0.75-2.68)                                                                                                                                                                                                                                                                                                                                                                                                                                                                                                     |
| Madsen                              | 2017             | 51         | Literature review<br>PRISMA<br>IPD-Work Consortium | Cohort                                                       | Up to Sept. 2015<br>Peer-reviewed journals<br>English language                    | 20                        | Clinical depression (published studies)<br>Hospital-treated clinical depression (unpublished studies) | Job strain                                                                                                                                                                                                             | Published studies (6 studies):<br>1.77 (1.47-2.13), heterogeneity: I <sup>2</sup> =24.2%<br>Adjusted for age, sex, cohabitation, and SES:<br>Unpublished studies (14 studies):<br>1.22 (1.02-1.47), heterogeneity: I <sup>2</sup> =24.8%                                                                                                                                                                                                                                                                                                                                                                                                                                |
| Magnavita                           | 2019             | 52         | Literature review<br>PRISMA                        | Cross-sectional, retrospective, case-control and prospective | Up to April 2019<br>English abstract and keyword, full-text in English or Italian | 7                         | Sleep problems                                                                                        | Workplace violence                                                                                                                                                                                                     | 2.55 (1.77-3.66), heterogeneity: I <sup>2</sup> =96%                                                                                                                                                                                                                                                                                                                                                                                                                                                                                                                                                                                                                    |



|               | Publication date | Ref number | Review / guidelines                  | Design(s) of primary studies                                                    | Other inclusion criteria                                                                                                | Number of primary studies | Outcome(s)                                                                                                                                                                                                                                       | Exposure(s)                                                                                                                                                                                                                                      | Main results: Pooled estimate(s) (95% CI)                                                                                                                                                                                                                                           |
|---------------|------------------|------------|--------------------------------------|---------------------------------------------------------------------------------|-------------------------------------------------------------------------------------------------------------------------|---------------------------|--------------------------------------------------------------------------------------------------------------------------------------------------------------------------------------------------------------------------------------------------|--------------------------------------------------------------------------------------------------------------------------------------------------------------------------------------------------------------------------------------------------|-------------------------------------------------------------------------------------------------------------------------------------------------------------------------------------------------------------------------------------------------------------------------------------|
|               |                  |            |                                      |                                                                                 |                                                                                                                         |                           |                                                                                                                                                                                                                                                  | Working hours:<br>--- RR reported (3 studies)                                                                                                                                                                                                    | 1.05 (0.93-1.17), heterogeneity: I <sup>2</sup> =0.0%                                                                                                                                                                                                                               |
| Nielsen       | 2020             | 55         | Literature review<br>PRISMA<br>MOOSE | Cross-sectional, prospective, retrospective, case-control, experimental designs | Up to Dec. 2017, update in Aug. 2018<br>English, German, French, or Scandinavian languages (Danish, Norwegian, Swedish) | 16                        | Sleep problems                                                                                                                                                                                                                                   | Workplace bullying                                                                                                                                                                                                                               | Cross-sectional studies (13 studies):<br>2.31 (1.93-2.75), heterogeneity: I <sup>2</sup> =90.1%<br>Prospective studies (5 studies):<br>1.62 (1.00-2.63), heterogeneity: I <sup>2</sup> =90.2%<br>No significant difference (p=0.18) between cross-sectional and prospective results |
| Nieuwenhuisen | 2010             | 56         | Literature review                    | Prospective                                                                     | Up to Oct 2008                                                                                                          | 7                         | Absenteeism due to mental health problems or a high level of psychological complaints as reflected in a score above a cut-off point on a validated questionnaire for fatigue, stress or non-specific mental ill-health or an adjustment disorder | Job demands (3 studies)<br>Low job control (2 studies)<br>Low co-worker support (2 studies)<br>Low supervisor support (3 studies)<br>Procedural injustice (2 studies)<br>Relational injustice (2 studies)<br>Effort-reward imbalance (4 studies) | 1.35 (1.22–1.50)<br>1.22 (1.10–1.36)<br>1.24 (1.13–1.37)<br><br>1.24 (1.13–1.35)<br><br>1.78 (1.59–2.00)<br>1.51 (1.35–1.69)<br>1.98 (1.78–2.20)                                                                                                                                    |
| Nyberg        | 2014             | 57         | IPD-Work Consortium                  | Cohort                                                                          |                                                                                                                         | 13                        | Type 2 diabetes                                                                                                                                                                                                                                  | Job strain                                                                                                                                                                                                                                       | Adjusted for age, sex, and SES:<br>1.15 (1.06–1.25), heterogeneity: I <sup>2</sup> =0%                                                                                                                                                                                              |
| Nyberg        | 2012             | 58         | IPD-Work Consortium                  | Cross-sectional and longitudinal analyses of prospective cohorts                |                                                                                                                         | 13                        | Obesity as assessed by body mass index (BMI) (reference group: BMI 18.5-24.9 kg/m <sup>2</sup> ):                                                                                                                                                | Job strain                                                                                                                                                                                                                                       | Cross-sectional associations adjusted for age, sex, and SES (13 studies):<br>Obese class I (30<=BMI<35 kg/m <sup>2</sup> ):<br>1.07 (1.02-1.12)<br>Obese classes II/III (BMI>=35 kg/m <sup>2</sup> ):<br>1.14 (1.01-1.28)<br>Prospective associations adjusted for age,             |

|                                     | Publication date | Ref number | Review / guidelines                           | Design(s) of primary studies | Other inclusion criteria                                                                                                                                                                                                                          | Number of primary studies | Outcome(s)                  | Exposure(s)                                                                   | Main results: Pooled estimate(s) (95% CI)                                                                                                                                                                                                                                                                                |
|-------------------------------------|------------------|------------|-----------------------------------------------|------------------------------|---------------------------------------------------------------------------------------------------------------------------------------------------------------------------------------------------------------------------------------------------|---------------------------|-----------------------------|-------------------------------------------------------------------------------|--------------------------------------------------------------------------------------------------------------------------------------------------------------------------------------------------------------------------------------------------------------------------------------------------------------------------|
|                                     |                  |            |                                               |                              |                                                                                                                                                                                                                                                   |                           |                             |                                                                               | sex, and SES (4 studies):<br>Obesity (BMI $\geq$ 30 kg/m <sup>2</sup> ):<br>0.99 (0.88-1.12)                                                                                                                                                                                                                             |
| Nyberg                              | 2013             | 59         | IPD-Work Consortium                           | Cross-sectional              |                                                                                                                                                                                                                                                   | 8                         | Cardiovascular risk factors | Job strain                                                                    | Adjusted for age, sex, and SES:<br>Hypertension<br>0.99 (0.93-1.04)<br>Diabetes<br>1.29 (1.11–1.51)<br>Smoking<br>1.14 (1.08–1.20)<br>High alcohol use<br>1.06 (0.99-1.14)<br>Physically inactive<br>1.34 (1.26–1.41)<br>Obesity<br>1.12 (1.04–1.20)<br>Framingham risk score $\geq$ 20%<br>1.13 (1.03–1.25)             |
| Palmer<br><br>Not in the extraction | 2013             | 60         | Literature review                             | All                          | 1966- Dec. 2011<br>Abstract in English                                                                                                                                                                                                            | 86                        | Pregnancy outcomes          | Long working hours $\geq$ 40 hours a week (reference group: <40 hours a week) | --- Preterm delivery (17 studies):<br>1.23 (1.13-1.34)<br>--- Small for gestational age (8 studies):<br>1.04 (0.94-1.16)                                                                                                                                                                                                 |
| Rönnblad                            | 2019             | 61         | Literature review<br>PRISMA<br>MOOSE<br>MECIR | Longitudinal                 | Jan. 2000-Sept. 2017<br>Publications in a peer-reviewed journal<br>English, Danish, Norwegian, Swedish language<br>European Economic Area (European Union, Iceland, Lichtenstein and Norway), Switzerland, Australia, New Zealand, USA and Canada | 10                        | Mental health outcomes      | Job insecurity                                                                | Stratified or adjusted for gender, age and SES:<br>Depressive symptoms (5 studies):<br>1.61 (1.29-2.00), heterogeneity: I <sup>2</sup> =44%<br>Anxiety (3 studies):<br>1.77 (1.18-2.65), heterogeneity: I <sup>2</sup> =52%<br>Psychotropic drug use (2 studies):<br>1.30 (1.09-1.56), heterogeneity: I <sup>2</sup> =0% |

|                                                         | Publication date | Ref number | Review / guidelines         | Design(s) of primary studies          | Other inclusion criteria                                                                                                                               | Number of primary studies | Outcome(s)                                                                                           | Exposure(s)                                                                                                                                                                                   | Main results: Pooled estimate(s) (95% CI)                                                                                                                                                                                                                                                                                                                                                                                                                                                      |
|---------------------------------------------------------|------------------|------------|-----------------------------|---------------------------------------|--------------------------------------------------------------------------------------------------------------------------------------------------------|---------------------------|------------------------------------------------------------------------------------------------------|-----------------------------------------------------------------------------------------------------------------------------------------------------------------------------------------------|------------------------------------------------------------------------------------------------------------------------------------------------------------------------------------------------------------------------------------------------------------------------------------------------------------------------------------------------------------------------------------------------------------------------------------------------------------------------------------------------|
| Rudkjoebing                                             | 2020             | 62         | Literature review<br>PRISMA | Cohort, case-control, cross-sectional | Up to May 2018<br>Publications in a peer-reviewed journal<br>English language                                                                          | 24                        | Depressive and anxiety disorder, depressive symptoms, anxiety symptoms, burnout, and disturbed sleep | Violence at the workplace defined as being exposed to direct aggressive physical assault or to threats of physical violence                                                                   | Stratified or adjusted for gender, age and SES:<br>Depression (4 studies):<br>1.42 (1.31-1.54), heterogeneity: I <sup>2</sup> =0%<br>Depressive symptoms (8 studies):<br>2.33 (1.71-3.17), heterogeneity: I <sup>2</sup> =42%<br>Anxiety symptoms (3 studies):<br>2.40 (0.78-7.36), heterogeneity: I <sup>2</sup> =90%<br>Burnout (6 studies):<br>1.60 (1.25-2.05), heterogeneity: I <sup>2</sup> =57%<br>Sleep impairment (3 studies):<br>1.49 (1.14-1.96), heterogeneity: I <sup>2</sup> =0% |
| Rugulies                                                | 2017             | 63         | Literature review<br>PRISMA | Prospective cohort                    | Up to Oct. 2016<br>Publications in a peer-reviewed journal<br>English, German, Danish, Norwegian, Swedish, French, or Spanish language                 | 8                         | Depressive disorders                                                                                 | Effort-reward imbalance (ERI)                                                                                                                                                                 | Least adjusted:<br>1.68 (1.40–2.01), heterogeneity: I <sup>2</sup> =60.2%                                                                                                                                                                                                                                                                                                                                                                                                                      |
| Stansfeld                                               | 2006             | 64         | Literature review<br>MOOSE  | Longitudinal                          | 1994–2005<br>English language<br>Industrially established, market economy countries (Europe, North America, New Zealand, Australia, Japan, and Russia) | 11                        | Common mental disorders                                                                              | Low decision latitude (3 studies)<br>Job demands (5 studies)<br>Job strain (2 studies)<br>Low social support (5 studies)<br>Effort-reward imbalance (2 studies)<br>Job insecurity (2 studies) | Most highly adjusted:<br>1.226 (1.084-1.386), heterogeneity: I <sup>2</sup> =44.2%<br>1.393 (1.152-1.685), heterogeneity: I <sup>2</sup> =92.0%<br>1.815 (1.062-3.101), heterogeneity: I <sup>2</sup> =92.0%<br>1.321 (1.213-1.438), heterogeneity: I <sup>2</sup> =92.0%<br>1.844 (1.449-2.345), heterogeneity: I <sup>2</sup> =92.0%<br>1.330 (1.062-1.666), heterogeneity: I <sup>2</sup> =92.0%                                                                                            |
| Step toe<br>Not in the extraction<br>Update of Kivimäki | 2012             | 65         | Literature review           | Prospective                           | Up to Dec. 2011                                                                                                                                        | 17                        | Coronary heart disease                                                                               | Job strain                                                                                                                                                                                    | Adjusted for age and sex:<br>1.4 (1.2-1.6), heterogeneity: I <sup>2</sup> <8%                                                                                                                                                                                                                                                                                                                                                                                                                  |

|                                                      | Publication date | Ref number | Review / guidelines                  | Design(s) of primary studies          | Other inclusion criteria                                                                                                                                                | Number of primary studies | Outcome(s)                                                                                          | Exposure(s)                                                                                                                                                                                                          | Main results: Pooled estimate(s) (95% CI)                                                                                                                                                                                                                                                                                                |
|------------------------------------------------------|------------------|------------|--------------------------------------|---------------------------------------|-------------------------------------------------------------------------------------------------------------------------------------------------------------------------|---------------------------|-----------------------------------------------------------------------------------------------------|----------------------------------------------------------------------------------------------------------------------------------------------------------------------------------------------------------------------|------------------------------------------------------------------------------------------------------------------------------------------------------------------------------------------------------------------------------------------------------------------------------------------------------------------------------------------|
| SJWEH 2006                                           |                  |            |                                      |                                       |                                                                                                                                                                         |                           |                                                                                                     |                                                                                                                                                                                                                      |                                                                                                                                                                                                                                                                                                                                          |
| Sui                                                  | 2016             | 66         | Literature review<br>PRISMA<br>MOOSE | Prospective cohort                    | Before Sept. 2014<br>English language                                                                                                                                   | 7                         | Type 2 diabetes                                                                                     | Job demands (3 studies)<br><br>Low decision latitude (3 studies)<br><br>Job strain (6 studies)                                                                                                                       | Most fully adjusted:<br>0.94 (0.72–1.23), heterogeneity: I <sup>2</sup> =52.0%<br>1.16 (0.85–1.58), heterogeneity: I <sup>2</sup> =59.0%<br>1.12 (0.95–1.32), heterogeneity: I <sup>2</sup> =61.0%                                                                                                                                       |
| Szerencsi                                            | 2012             | 67         | Literature review                    | Cohort, case-control, cross-sectional | Up to Feb. 2009<br>No restriction for language                                                                                                                          | 71                        | Cardiovascular disease (CVD)                                                                        | Job strain (46 studies)<br>High job demands (37 studies)<br>Low decision latitude (43 studies)                                                                                                                       | 1.30 (1.14–1.46)<br>1.05 (0.97–1.14)<br>1.14 (1.05–1.23)                                                                                                                                                                                                                                                                                 |
| Taouk                                                | 2020             | 68         | Literature review<br>PRISMA          | Cohort                                | Up to the end of 2017                                                                                                                                                   | 18                        | Coronary heart disease mortality                                                                    | Low job control (5 studies)<br>High job demands (4 studies)<br><br>Job strain (7 studies)                                                                                                                            | Minimally-adjusted:<br>1.50 (1.42-1.58), heterogeneity: I <sup>2</sup> =0.0%<br>0.89 (0.61-1.29), heterogeneity: I <sup>2</sup> =69.4%<br>1.31 (0.91-1.88), heterogeneity: I <sup>2</sup> =55.2%                                                                                                                                         |
| Theorell<br><br>Not in the extraction                | 2015             | 69         | Literature review                    | Prospective, case-control             | 1990-June 2013<br>Europe, North America, Australia and New Zealand<br>n>100<br>Results adjusted for age and adjustment or stratification for gender<br>English language | 59                        | Depressive symptoms                                                                                 | Low decision latitude (13 studies)<br>Job strain (11 studies)<br>Bullying (3 studies)                                                                                                                                | Adjusted for age and gender - Least adjusted:<br>1.37 (1.30-1.47)<br>1.74 (1.53-1.96)<br>2.82 (2.21-3.59)                                                                                                                                                                                                                                |
| van der Molen<br><br>Update of Nieuwenhuisen OM 2010 | 2020             | 70         | Literature review<br>PRISMA          | Prospective cohort                    | 2008-Aug. 2019 + eligible studies before 2008 retrieved from the systematic review by Nieuwenhuijsen et al. 2010                                                        | 17                        | (i) a stress-related disorder diagnosis following a clinical anamnesis, (ii) a high level of stress | Effort-reward imbalance (6 studies)<br>Low procedural justice (5 studies)<br>Low relational justice (5 studies)<br>Job demands (8 studies)<br>Low coworker support (4 studies)<br>Low supervisor support (5 studies) | 1.91 (1.70-2.15), heterogeneity: I <sup>2</sup> =48%<br>1.74 (1.62-1.86), heterogeneity: I <sup>2</sup> =0%<br>1.55 (1.44-1.67), heterogeneity: I <sup>2</sup> =0%<br>1.56 (1.41-1.72), heterogeneity: I <sup>2</sup> =49%<br>1.29 (1.17-1.43), heterogeneity: I <sup>2</sup> =0%<br>1.27 (1.16-1.38), heterogeneity: I <sup>2</sup> =0% |

|            | Publication date | Ref number | Review / guidelines                               | Design(s) of primary studies                                       | Other inclusion criteria                                      | Number of primary studies | Outcome(s)                                                                                                                                                                                       | Exposure(s)                                                                                                                                                             | Main results: Pooled estimate(s) (95% CI)                                                                                                                                                                                                                                                                                         |
|------------|------------------|------------|---------------------------------------------------|--------------------------------------------------------------------|---------------------------------------------------------------|---------------------------|--------------------------------------------------------------------------------------------------------------------------------------------------------------------------------------------------|-------------------------------------------------------------------------------------------------------------------------------------------------------------------------|-----------------------------------------------------------------------------------------------------------------------------------------------------------------------------------------------------------------------------------------------------------------------------------------------------------------------------------|
|            |                  |            |                                                   |                                                                    |                                                               |                           | complaints as assessed in a score above a cut-off point on a validated questionnaire for fatigue, stress or non-specific mental ill-health or (iii) absenteeism from work due to stress problems | Low support (2 studies)<br>Emotional demands (2 studies)<br>Low decision authority (2 studies)<br>Low decision latitude (2 studies)<br>Low skill discretion (2 studies) | 1.41 (1.18-1.69), heterogeneity: I <sup>2</sup> =10%<br>1.58 (1.35-1.84), heterogeneity: I <sup>2</sup> =0%<br>1.34 (1.20-1.49), heterogeneity: I <sup>2</sup> =0%<br>1.07 (0.92-1.25), heterogeneity: I <sup>2</sup> =0%<br>1.11 (0.94-1.32), heterogeneity: I <sup>2</sup> =0%                                                  |
| Van Melick | 2014             | 71         | Literature review<br>PRISMA                       | Prospective or retrospective cohort, case-control, cross-sectional | 1990-Nov.2013<br>English, German, French or Spanish language  | 13                        | Preterm birth                                                                                                                                                                                    | Long working hours >40 h/week (11 studies)                                                                                                                              | Most adjusted:<br>1.25 (1.01-1.54), heterogeneity: I <sup>2</sup> =62%                                                                                                                                                                                                                                                            |
| Virtanen   | 2012             | 72         | Literature review<br>MOOSE                        | Prospective cohort, case-control, cross-sectional                  | Up to March 2011<br>Peer-reviewed studies<br>English language | 12                        | Coronary heart disease                                                                                                                                                                           | Long working hours                                                                                                                                                      | Minimally adjusted and SES-adjusted (7 studies):<br>2.06 (1.55-2.74)                                                                                                                                                                                                                                                              |
| Virtanen   | 2013             | 73         | Literature review<br>MOOSE<br>IPD-Work Consortium | Prospective cohort                                                 | Up to Oct. 2012<br>English language                           | 17                        | Coronary heart disease                                                                                                                                                                           | Job insecurity                                                                                                                                                          | Age-adjusted:<br>1.32 (1.09-1.59), heterogeneity:<br>I <sup>2</sup> =40.7%                                                                                                                                                                                                                                                        |
| Virtanen   | 2015             | 74         | Literature review<br>MOOSE<br>IPD-Work Consortium | Cross-sectional, case-control, prospective                         | Up to April 2014<br>Peer-reviewed studies<br>English language | 81                        | Alcohol use                                                                                                                                                                                      | Long working hours                                                                                                                                                      | Cross-sectional association (61 studies):<br>--- alcohol use: 1.11 (1.05-1.18), heterogeneity: I <sup>2</sup> =72%<br>--- risky alcohol use: 1.14 (0.89-1.47), heterogeneity: I <sup>2</sup> =69%<br>Prospective association for new onset risky alcohol use (20 studies):<br>1.12 (1.04-1.20), heterogeneity: I <sup>2</sup> =0% |

|                                       | Publication date | Ref number | Review / guidelines                                | Design(s) of primary studies                   | Other inclusion criteria                                                                                                                                                              | Number of primary studies | Outcome(s)                                                                      | Exposure(s)                                                                | Main results: Pooled estimate(s) (95% CI)                                                                                                                                                                                                                                                                                                                                                                                             |
|---------------------------------------|------------------|------------|----------------------------------------------------|------------------------------------------------|---------------------------------------------------------------------------------------------------------------------------------------------------------------------------------------|---------------------------|---------------------------------------------------------------------------------|----------------------------------------------------------------------------|---------------------------------------------------------------------------------------------------------------------------------------------------------------------------------------------------------------------------------------------------------------------------------------------------------------------------------------------------------------------------------------------------------------------------------------|
| Virtanen<br>Update of Kivimäki L 2015 | 2018             | 75         | Literature review<br>IPD-Work Consortium           | Prospective cohort                             | Up to June 2018                                                                                                                                                                       | 23 (CHD)<br>15 (Stroke)   | Coronary heart disease and stroke                                               | Long working hours                                                         | Adjusted for age, sex, and SES:<br>--- coronary heart disease: 1.12 (1.03-1.21), heterogeneity: I <sup>2</sup> =0%<br>--- stroke: 1.21 (1.01-1.45), heterogeneity: I <sup>2</sup> =15.2%                                                                                                                                                                                                                                              |
| Virtanen<br>Not in the extraction     | 2005             | 76         | Literature review                                  | Prospective, retrospective and cross-sectional | Up to Oct. 2003<br>Peer-reviewed studies<br>English, French, Spanish, or Italian language<br>Exclusion of studies that only focused on part-time, and those limited to job insecurity | 27                        | Health outcomes including musculoskeletal disorders and psychological morbidity | Temporary employment                                                       | Musculoskeletal disorders (6 studies): 1.24 (0.69-2.22), heterogeneity: Q=484.19, P<0.001<br>Psychological morbidity (7 studies): 1.25 (1.14-1.38), heterogeneity: Q=32.91, P=0.012                                                                                                                                                                                                                                                   |
| Virtanen                              | 2020             | 77         | IPD-Work Consortium                                | Prospective cohort                             | Europe, North America, and Australia                                                                                                                                                  | 19                        | Onset of overweight/obesity (BMI ≥ 25 kg/m <sup>2</sup> )                       | Long working hours (reference group: 35-40 h/week)                         | Adjusted for age, sex, and SES:<br>Working hours 41-48 h/week: 1.07 (1.02-1.12), heterogeneity: I <sup>2</sup> =0.0%<br>Working hours 49-54 h/week: 1.09 (1.03-1.16), heterogeneity: I <sup>2</sup> =0.0%<br>Working hours ≥ 55 h/week: 1.17 (1.08-1.27), heterogeneity: I <sup>2</sup> =38.0%<br>Dose-response relation between longer working hours and the risk of increasing body weight (P for trend <0.0001 in meta-regression) |
| Virtanen                              | 2018             | 78         | Literature review<br>PRISMA<br>IPD-Work Consortium | Prospective cohort                             | Up to Jan. 2017<br>English language<br>Follow-up of 1-5 years                                                                                                                         | 28                        | Depressive symptoms                                                             | Long working hours (defined as working ≥55 hours per week in most studies) | Adjustment for age, sex, SES, and marital status (unpublished studies) and closest to that set of adjustments (published studies): 1.14 (1.03-1.25), heterogeneity: I <sup>2</sup> =45.1%                                                                                                                                                                                                                                             |
| Watanabe                              | 2016             | 79         | Literature review<br>PRISMA                        | Prospective (cohort, nested case-control)      | Up to July 2016                                                                                                                                                                       | 7                         | Depressive disorders clinically diagnosed or assessed by a structured interview | Overtime work (defined as at least >40 hours a week)                       | Adjusted for demographic covariates: 1.08 (0.83-1.39), heterogeneity: I <sup>2</sup> =16.7%                                                                                                                                                                                                                                                                                                                                           |

|          | Publication date | Ref number | Review / guidelines                  | Design(s) of primary studies                      | Other inclusion criteria                      | Number of primary studies | Outcome(s)                            | Exposure(s)                                                                                    | Main results: Pooled estimate(s) (95% CI)                                                                                                                                                                                                                                                                                                                                                                                                                                                                                                                                                                                                       |
|----------|------------------|------------|--------------------------------------|---------------------------------------------------|-----------------------------------------------|---------------------------|---------------------------------------|------------------------------------------------------------------------------------------------|-------------------------------------------------------------------------------------------------------------------------------------------------------------------------------------------------------------------------------------------------------------------------------------------------------------------------------------------------------------------------------------------------------------------------------------------------------------------------------------------------------------------------------------------------------------------------------------------------------------------------------------------------|
| Watanabe | 2018             | 80         | Literature review<br>PRISMA<br>MOOSE | Longitudinal or prospective cohort                | Up to 2016<br>English or Japanese language    | 8                         | Metabolic syndrome                    | Job strain (4 studies)                                                                         | Adjusted by demographic variables (e.g. age, sex, education and marital status) and lifestyle variables (e.g. smoking, physical activity and sleep):<br>1.75 (1.09–2.79)                                                                                                                                                                                                                                                                                                                                                                                                                                                                        |
| Wong     | 2019             | 81         | Literature review                    | Cross-sectional, case-control, prospective cohort | 1998-2018                                     | 46                        | Health outcomes                       | Long working hours                                                                             | Cardiovascular heart diseases (11 studies):<br>1.539 (1.324-1.789)<br>Type 2 diabetes (2 studies):<br>0.855 (0.497-1.472)<br>Anxiety (2 studies):<br>1.308 (1.041-1.644)<br>Depressive symptoms (7 studies):<br>1.489 (1.220-1.817)<br>Heavy drinking (5 studies):<br>1.083 (0.943-1.244)<br>Physical inactivity (4 studies):<br>1.234 (1.002-1.520)<br>Smoking (4 studies):<br>1.055 (0.890-1.251)<br>Unhealthy food habits (3 studies):<br>0.990 (0.796-1.230)<br>Poor sleep quality (2 studies):<br>1.276 (1.128-1.444)<br>Short sleep duration (4 studies):<br>1.909 (1.502-2.427)<br>Sleep disturbance (3 studies):<br>1.395 (1.052-1.850) |
| Xu       | 2015             | 82         | Literature review<br>MOOSE           | Prospective cohort                                | Up to Oct. 2014<br>No restriction on language | 14                        | Coronary heart disease                | High strain, passive and active job (reference group: low strain)<br>Low control, high demands | Multivariate-adjusted:<br>High-strain (11 studies):<br>1.26 (1.12–1.41), heterogeneity: $I^2=23\%$<br>Passive job (9 studies):<br>1.14 (1.02–1.29), heterogeneity: $I^2=0\%$<br>Active job (10 studies): 1.09 (0.97–1.22), heterogeneity: $I^2=0\%$<br>Low control (11 studies):<br>1.06 (0.93–1.19), heterogeneity: $I^2=54\%$<br>High demand (9 studies):<br>1.13 (0.97–1.32), heterogeneity: $I^2=63\%$                                                                                                                                                                                                                                      |
| Yang     | 2019             | 83         | Literature review<br>MOOSE           | Case–control, cohort                              | Up to June 2018<br>No restriction on language | 17                        | Cancer (any cancer, lung, colorectal, | Job strain                                                                                     | --- any cancer (13 studies):<br>1.06 (0.96–1.16), heterogeneity: $I^2=1.9\%$<br>--- lung cancer (13 studies):                                                                                                                                                                                                                                                                                                                                                                                                                                                                                                                                   |

|      | Publication date | Ref number | Review / guidelines         | Design(s) of primary studies          | Other inclusion criteria                                          | Number of primary studies | Outcome(s)                                                                                                                 | Exposure(s)                                                                                                                                                                                                    | Main results: Pooled estimate(s) (95% CI)                                                                                                                                                                                                                                                                    |
|------|------------------|------------|-----------------------------|---------------------------------------|-------------------------------------------------------------------|---------------------------|----------------------------------------------------------------------------------------------------------------------------|----------------------------------------------------------------------------------------------------------------------------------------------------------------------------------------------------------------|--------------------------------------------------------------------------------------------------------------------------------------------------------------------------------------------------------------------------------------------------------------------------------------------------------------|
|      |                  |            |                             |                                       |                                                                   |                           | esophagus, prostate, breast)                                                                                               |                                                                                                                                                                                                                | 1.16 (0.89–1.50), heterogeneity: $I^2=0.0\%$<br>--- colorectal cancer (12 studies):<br>1.16 (0.90–1.48), heterogeneity: $I^2=0.0\%$<br>--- prostate cancer (10 studies):<br>0.87 (0.69–1.10), heterogeneity: $I^2=0.0\%$<br>--- breast cancer (12 studies):<br>1.06 (0.90–1.24), heterogeneity: $I^2=12.8\%$ |
| Yang | 2018             | 84         | Literature review<br>PRISMA | Cross-sectional, prospective          | 1980-Jan. 2014<br>English or Japanese language<br>Europe and Asia | 17                        | Insomnia symptoms                                                                                                          | Effort-reward imbalance (5 studies)<br>High demand-low control (7 studies)<br>High demand (4 studies)<br><br>Low control (3 studies)<br>Low social support (3 studies)<br><br>Work-family conflict (2 studies) | 2.63 (1.22–5.69), heterogeneity: $I^2=95.1\%$<br>1.23 (1.14-1.34), heterogeneity: $I^2=34.4\%$<br>1.35 (1.20–1.51), heterogeneity: $I^2=29.0\%$<br>1.12 (0.99-1.26), heterogeneity: $I^2=0.0\%$<br>1.67 (1.11–2.52), heterogeneity: $I^2=61.3\%$<br>2.32 (1.53–3.51), heterogeneity: $I^2=80.5\%$            |
| Zhu  | 2020             | 85         | Literature review<br>MOOSE  | Cross-sectional, case-control, cohort | Up to June 2019<br>English language                               | 29                        | Weight-related outcomes (weight gain/BMI increase, BMI $\geq 25$ kg/m <sup>2</sup> , and BMI $\geq 30$ kg/m <sup>2</sup> ) | Long working hours (defined as at least >40 hours a week)                                                                                                                                                      | All designs (29 studies):<br>1.13 (1.07-1.19), heterogeneity: $I^2=75.7\%$                                                                                                                                                                                                                                   |

IPD-Work consortium studies with literature review were underlined in orange and those without literature review were underlined in yellow

Supplementary Table S1 (part 2). Description of the included reviews

| First author                          | Publication date | Ref. number | Gender differences                                                                                                                      | Results from other subgroup/sensitivity analyses                                                                                                                                                                                                            | Adjustment variables of main results | Statistical methods for pooled estimates | Publication bias assessment                                                                             | Quality assessment of primary studies and/or evidence                                   |
|---------------------------------------|------------------|-------------|-----------------------------------------------------------------------------------------------------------------------------------------|-------------------------------------------------------------------------------------------------------------------------------------------------------------------------------------------------------------------------------------------------------------|--------------------------------------|------------------------------------------|---------------------------------------------------------------------------------------------------------|-----------------------------------------------------------------------------------------|
| Amiri                                 | 2020             | 14          | Men (9 studies): 1.38 (1.09-1.75), heterogeneity: $I^2=52.1\%$<br><br>Women (10 studies): 1.28 (1.01-1.63), heterogeneity: $I^2=65.8\%$ |                                                                                                                                                                                                                                                             | None or any adjustment               | Random effects model                     | Yes<br>No evidence of publication bias according to Begg's test and Egger's test                        | Yes<br>Effective Public Health Practice Project (EPHPPC) Quality Assessment Tool        |
| Aronsson<br><br>Not in the extraction | 2017             | 15          |                                                                                                                                         |                                                                                                                                                                                                                                                             | At least age and gender              | Fixed effects model                      | No                                                                                                      | Yes<br>GRADE                                                                            |
| Babu                                  | 2014             | 16          |                                                                                                                                         | Case-control (3 studies): 2.88 (1.63-5.09)<br>Cohort (6 studies): 1.24 (1.09-1.41)                                                                                                                                                                          | Any adjustment                       | Random effects model                     | Yes<br>Minimal publication bias based on funnel plots                                                   | Yes                                                                                     |
| Bonde                                 | 2013             | 17          | Not applicable                                                                                                                          | Studies of higher methodological quality (3 studies): 1.17 (0.80-1.71), heterogeneity: $Q=9.60$ , $p=0.008$                                                                                                                                                 | Any adjustment                       | Fixed effects model                      | Yes<br>Potential for overestimation of risks through publication bias based on funnel plots             | Yes                                                                                     |
| Bonzini                               | 2007             | 18          | Not applicable                                                                                                                          | Studies of higher methodological quality (5 studies): 1.20 (0.98-1.47), heterogeneity: $Q=1.32$ , $p=0.86$                                                                                                                                                  | Any adjustment                       | Random effects model                     | Yes<br>Funnel plots suggested a degree of publication bias (smaller studies increasingly more positive) | Yes                                                                                     |
| Cai                                   | 2019             | 19          | Not applicable                                                                                                                          | Adjusted results:<br>--- Preterm delivery (6 studies): 1.25 (1.01-1.55), heterogeneity: $I^2=0\%$<br>--- Miscarriage (5 studies): 1.73 (1.27-2.35), heterogeneity: $I^2=0\%$<br>--- Preeclampsia (1 study): 1.04 (0.48-2.26), heterogeneity: not applicable | None or any adjustment               | Random effects model                     | Yes<br>No evidence of publication bias based on funnel plots                                            | Yes<br>Joanna Briggs Institute Critical Appraisal of Evidence Effectiveness tool, GRADE |

| First author | Publication date | Ref. number | Gender differences                                                                  | Results from other subgroup/sensitivity analyses                                                                                                                                                                                                                                                                                                                                                                                                                                                                                                                                                                                                                                                                                                                                                                                                                                                                                                                                                                                                                                                                                                                                                               | Adjustment variables of main results                                                       | Statistical methods for pooled estimates | Publication bias assessment                                           | Quality assessment of primary studies and/or evidence                                                  |
|--------------|------------------|-------------|-------------------------------------------------------------------------------------|----------------------------------------------------------------------------------------------------------------------------------------------------------------------------------------------------------------------------------------------------------------------------------------------------------------------------------------------------------------------------------------------------------------------------------------------------------------------------------------------------------------------------------------------------------------------------------------------------------------------------------------------------------------------------------------------------------------------------------------------------------------------------------------------------------------------------------------------------------------------------------------------------------------------------------------------------------------------------------------------------------------------------------------------------------------------------------------------------------------------------------------------------------------------------------------------------------------|--------------------------------------------------------------------------------------------|------------------------------------------|-----------------------------------------------------------------------|--------------------------------------------------------------------------------------------------------|
|              |                  |             |                                                                                     | <p>--- Gestational hypertension (1 study): 0.43 (0.20-0.91), heterogeneity: not applicable</p> <p>--- Small for gestational age (5 studies): 1.76 (0.96-3.21), heterogeneity: I<sup>2</sup>=76%</p> <p>--- Low birth weight (3 studies): 1.37 (0.89-2.11), heterogeneity: I<sup>2</sup>=0%</p> <p>Unadjusted results:</p> <p>--- Preterm delivery (19 studies): 1.21 (1.09-1.34), heterogeneity: I<sup>2</sup>=40%</p> <p>--- Miscarriage (5 studies): 1.22 (0.87-1.70), heterogeneity: I<sup>2</sup>=86%</p> <p>--- Preeclampsia (4 studies): 1.32 (0.70-2.49), heterogeneity: I<sup>2</sup>=87%</p> <p>--- Gestational hypertension (4 studies): 1.11 (0.86-1.43), heterogeneity: I<sup>2</sup>=40%</p> <p>--- Small for gestational age (7 studies): 1.06 (0.97-1.17), heterogeneity: I<sup>2</sup>=0%</p> <p>--- Low birth weight (3 studies): 1.42 (1.00-2.02), heterogeneity: I<sup>2</sup>=18%</p> <p>Test for differences between adjusted and unadjusted results:</p> <p>--- Preterm delivery: p=0.77</p> <p>--- Miscarriage: p=0.13</p> <p>--- Preeclampsia: p=0.64</p> <p>--- Gestational hypertension: p=0.02</p> <p>--- Small for gestational age: p=0.11</p> <p>--- Low birth weight: p=0.89</p> |                                                                                            |                                          |                                                                       |                                                                                                        |
| Cosgrove     | 2012             | 20          |                                                                                     | Unadjusted or least adjusted versus most adjusted models                                                                                                                                                                                                                                                                                                                                                                                                                                                                                                                                                                                                                                                                                                                                                                                                                                                                                                                                                                                                                                                                                                                                                       | Most adjusted models                                                                       | Random effects model                     | No                                                                    | Yes                                                                                                    |
| Descatha     | 2020             | 21          | No gender difference                                                                | No difference according to WHO region, age, SES, and type of stroke                                                                                                                                                                                                                                                                                                                                                                                                                                                                                                                                                                                                                                                                                                                                                                                                                                                                                                                                                                                                                                                                                                                                            | Adjusted for at least age, sex, and SES (except 2 cohort studies and 1 case-control study) | Random effects model                     | Yes<br>No serious concerns for publication bias based on funnel plots | Yes<br>Modified version of the Navigation Guide quality of evidence assessment approach based on GRADE |
| Dragano      | 2017             | 22          | Men, adjusted for age and sex: 1.19 (1.02-1.40)<br>Women, adjusted for age and sex: | Adjusted for age and sex: 1.16 (1.01-1.34), heterogeneity: I <sup>2</sup> =0%                                                                                                                                                                                                                                                                                                                                                                                                                                                                                                                                                                                                                                                                                                                                                                                                                                                                                                                                                                                                                                                                                                                                  | Adjusted for age, sex, and SES                                                             | Random effects model                     | No                                                                    | No                                                                                                     |

| First author | Publication date | Ref. number | Gender differences                                                                                                                                             | Results from other subgroup/sensitivity analyses                                                                                                                                                                                                                                                                                                                              | Adjustment variables of main results           | Statistical methods for pooled estimates                                                      | Publication bias assessment                                                                                                                                                                                 | Quality assessment of primary studies and/or evidence                       |
|--------------|------------------|-------------|----------------------------------------------------------------------------------------------------------------------------------------------------------------|-------------------------------------------------------------------------------------------------------------------------------------------------------------------------------------------------------------------------------------------------------------------------------------------------------------------------------------------------------------------------------|------------------------------------------------|-----------------------------------------------------------------------------------------------|-------------------------------------------------------------------------------------------------------------------------------------------------------------------------------------------------------------|-----------------------------------------------------------------------------|
|              |                  |             | 1.08 (0.78-1.50)<br>No gender difference                                                                                                                       | Adjusted for age, sex, SES and lifestyle factors: 1.18 (1.02-1.37)<br><br>Adjusted for age, sex, SES, lifestyle factors, and job strain: 1.16 (1.00-1.35)<br><br>After exclusion of the first 3 years of follow-up, adjusted for age and sex: 1.21 (1.03-1.41), heterogeneity: I <sup>2</sup> =0%<br><br>No difference according to age, SES, and ERI measure                 |                                                |                                                                                               |                                                                                                                                                                                                             |                                                                             |
| Duchaine     | 2020             | 23          |                                                                                                                                                                |                                                                                                                                                                                                                                                                                                                                                                               | Adjusted for age, sex, and SES or most of them | Random effects model                                                                          | Yes<br>No publication bias was found in the funnel plots for job strain, psychological demands, or social support. Not enough studies to assess publication bias for the other psychosocial work stressors. | Yes<br>Risk of Bias in Non-Randomized Studies–Interventions (ROBINS-I) tool |
| Ferrie       | 2016             | 24          | Adjustment for age, sex, SES, obesity, physical activity, alcohol use and smoking:<br>Men: 1.14 (0.99-1.31)<br>Women: 1.12 (0.96-1.32)<br>No gender difference | Adjusted for age and sex (19 studies): 1.19 (1.09–1.30), heterogeneity: I <sup>2</sup> =24%<br><br>Adjusted for age, sex, SES and obesity, physical activity, alcohol use, and smoking:<br>--- all studies (15 studies): 1.12 (1.01–1.24)<br>--- high-quality studies: 1.19 (1.04–1.35)<br>--- poor-quality studies: 1.00 (0.84-1.20)<br><br>No difference according to study | Adjusted for age, sex, and SES                 | Fixed effects model because no significant heterogeneity between the study-specific estimates | No                                                                                                                                                                                                          | Yes<br>Cochrane risk-of-bias tool for cohort studies                        |

| First author                          | Publication date | Ref. number | Gender differences                                                                                                                                                                                                                                                                                                                                                | Results from other subgroup/sensitivity analyses                                                                                                                                                                                                                                                                                                                                                     | Adjustment variables of main results                                                                                    | Statistical methods for pooled estimates                                                                                                                                                                                                               | Publication bias assessment | Quality assessment of primary studies and/or evidence |
|---------------------------------------|------------------|-------------|-------------------------------------------------------------------------------------------------------------------------------------------------------------------------------------------------------------------------------------------------------------------------------------------------------------------------------------------------------------------|------------------------------------------------------------------------------------------------------------------------------------------------------------------------------------------------------------------------------------------------------------------------------------------------------------------------------------------------------------------------------------------------------|-------------------------------------------------------------------------------------------------------------------------|--------------------------------------------------------------------------------------------------------------------------------------------------------------------------------------------------------------------------------------------------------|-----------------------------|-------------------------------------------------------|
|                                       |                  |             |                                                                                                                                                                                                                                                                                                                                                                   | quality, age, SES, method of diabetes diagnosis, and study location                                                                                                                                                                                                                                                                                                                                  |                                                                                                                         |                                                                                                                                                                                                                                                        |                             |                                                       |
| Fransson                              | 2012             | 25          | Cross-sectional associations stratified by gender and adjusted for sex, age, SES and smoking:<br>Men<br>--- high strain: 1.36 (1.28-1.44)<br>--- passive job: 1.27 (1.21-1.34)<br>--- active job: 1.05 (1.00-1.11)<br>Women<br>--- high strain: 1.28 (1.21-1.35)<br>--- passive job: 1.27 (1.21-1.34)<br>--- active job: 1.08 (1.02-1.14)<br>No gender difference | Cross-sectional associations adjusted for sex, age, SES, and smoking (10 studies):<br>--- high strain: 1.26 (1.15-1.38), heterogeneity: I <sup>2</sup> =77.5%<br>--- passive job: 1.21 (1.11-1.31), heterogeneity: I <sup>2</sup> =76.7%<br>--- active job: 1.06 (1.00-1.12), heterogeneity: I <sup>2</sup> =55.6%<br><br>No differences according to age, SES, smoking status, or time of the study | Cross-sectional analyses: adjusted for sex and age<br><br>Prospective analyses: adjusted for sex, age, SES, and smoking | Cross-sectional data: 2-stage random effects model, subgroup analyses using 1-stage individual-level mixed-effects logistic regression model<br>Prospective data: 1-stage individual-level meta-analysis using mixed-effects logistic regression model | No                          | No                                                    |
| Fransson                              | 2015             | 26          |                                                                                                                                                                                                                                                                                                                                                                   | Age- and sex-adjusted results:<br>--- ischemic stroke: 1.24 (1.05-1.47), heterogeneity: I <sup>2</sup> =2.4%<br>--- hemorrhagic stroke: 1.01 (0.75-1.36), heterogeneity: I <sup>2</sup> =11.7%                                                                                                                                                                                                       | Age- and sex-adjusted or age-, sex-, and SES adjusted                                                                   | Random effects model                                                                                                                                                                                                                                   | No                          | No                                                    |
| Hauke                                 | 2011             | 27          |                                                                                                                                                                                                                                                                                                                                                                   |                                                                                                                                                                                                                                                                                                                                                                                                      | The most adjusted effect sizes available in each study                                                                  | Random effects model                                                                                                                                                                                                                                   | No                          | Yes                                                   |
| Heikkila<br><br>Not in the extraction | 2016             | 28          |                                                                                                                                                                                                                                                                                                                                                                   | Adjusted for age, sex, SES, shift work and night-time work:<br><br>Working hours 41-48 h/week:<br>--- any cancer (12 studies):                                                                                                                                                                                                                                                                       | Adjusted for age and sex                                                                                                | Random effects model                                                                                                                                                                                                                                   | No                          | No                                                    |

| First author | Publication date | Ref. number | Gender differences | Results from other subgroup/sensitivity analyses                                                                                                                                                                                                                                                                                                                                                                                                                                                                                                                                                                                                                                                                                                                                                                                                                                                                                                                                                                                                                                                                                                                                                                                                                                                                                                                                                                                                                                                                                                                       | Adjustment variables of main results | Statistical methods for pooled estimates | Publication bias assessment | Quality assessment of primary studies and/or evidence |
|--------------|------------------|-------------|--------------------|------------------------------------------------------------------------------------------------------------------------------------------------------------------------------------------------------------------------------------------------------------------------------------------------------------------------------------------------------------------------------------------------------------------------------------------------------------------------------------------------------------------------------------------------------------------------------------------------------------------------------------------------------------------------------------------------------------------------------------------------------------------------------------------------------------------------------------------------------------------------------------------------------------------------------------------------------------------------------------------------------------------------------------------------------------------------------------------------------------------------------------------------------------------------------------------------------------------------------------------------------------------------------------------------------------------------------------------------------------------------------------------------------------------------------------------------------------------------------------------------------------------------------------------------------------------------|--------------------------------------|------------------------------------------|-----------------------------|-------------------------------------------------------|
|              |                  |             |                    | <p>0.97 (0.87-1.07), heterogeneity: <math>I^2=18.1\%</math></p> <p>--- colorectal cancer (10 studies):<br/>1.03 (0.75-1.40), heterogeneity: <math>I^2=0\%</math></p> <p>--- lung cancer (10 studies):<br/>0.96 (0.64-1.44), heterogeneity: <math>I^2=0\%</math></p> <p>--- breast cancer (10 studies):<br/>0.91 (0.70-1.17), heterogeneity: <math>I^2=8.2\%</math></p> <p>--- prostate cancer (9 studies):<br/>0.88 (0.69-1.13), heterogeneity: <math>I^2=4.9\%</math></p> <p>Working hours 49-54 h/week:<br/>--- any cancer (11 studies):<br/>1.07 (0.94-1.21), heterogeneity: <math>I^2=0\%</math></p> <p>--- colorectal cancer (8 studies):<br/>1.40 (0.93-2.11), heterogeneity: <math>I^2=0\%</math></p> <p>--- lung cancer (5 studies):<br/>0.82 (0.40-1.70), heterogeneity: <math>I^2=0\%</math></p> <p>--- breast cancer (9 studies):<br/>0.85 (0.55-1.31), heterogeneity: <math>I^2=7.8\%</math></p> <p>--- prostate cancer (10 studies):<br/>1.29 (0.97-1.71), heterogeneity: <math>I^2=0\%</math></p> <p>Working hours <math>\geq 55</math> h/week:<br/>--- any cancer (10 studies):<br/>0.93 (0.81-1.06), heterogeneity: <math>I^2=0\%</math></p> <p>--- colorectal cancer (7 studies):<br/>1.03 (0.57-1.89), heterogeneity: <math>I^2=25.9\%</math></p> <p>--- lung cancer (7 studies):<br/>0.72 (0.37-1.40), heterogeneity: <math>I^2=0\%</math></p> <p>--- breast cancer (6 studies):<br/>1.49 (1.05-2.11), heterogeneity: <math>I^2=0\%</math></p> <p>--- prostate cancer (9 studies):<br/>1.07 (0.65-1.77), heterogeneity: <math>I^2=33.0\%</math></p> |                                      |                                          |                             |                                                       |
| Heikkila     | 2013             | 29          |                    | <p>Adjusted for age, sex, SES, BMI, smoking, and alcohol intake:<br/>--- any cancer (12 studies):<br/>0.97 (0.90-1.04), heterogeneity: <math>I^2=0\%</math></p> <p>--- colorectal cancer (12 studies):</p>                                                                                                                                                                                                                                                                                                                                                                                                                                                                                                                                                                                                                                                                                                                                                                                                                                                                                                                                                                                                                                                                                                                                                                                                                                                                                                                                                             | Adjusted for age and sex             | Random effects model                     | No                          | No                                                    |

| First author | Publication date | Ref. number | Gender differences                                                                                                                                                                                                                                                                     | Results from other subgroup/sensitivity analyses                                                                                                                                                                                                                                                                                                                                                                                                                                                                                                                                | Adjustment variables of main results | Statistical methods for pooled estimates | Publication bias assessment | Quality assessment of primary studies and/or evidence |
|--------------|------------------|-------------|----------------------------------------------------------------------------------------------------------------------------------------------------------------------------------------------------------------------------------------------------------------------------------------|---------------------------------------------------------------------------------------------------------------------------------------------------------------------------------------------------------------------------------------------------------------------------------------------------------------------------------------------------------------------------------------------------------------------------------------------------------------------------------------------------------------------------------------------------------------------------------|--------------------------------------|------------------------------------------|-----------------------------|-------------------------------------------------------|
|              |                  |             |                                                                                                                                                                                                                                                                                        | <p>1.16 (0.90-1.48), heterogeneity: <math>I^2=0\%</math><br/> --- lung cancer (12 studies):<br/> 1.17 (0.88-1.54), heterogeneity: <math>I^2=0\%</math><br/> --- breast cancer (11 studies):<br/> 0.97 (0.82-1.14), heterogeneity: <math>I^2=0\%</math><br/> --- prostate cancer (10 studies):<br/> 0.86 (0.68-1.09), heterogeneity: <math>I^2=0\%</math></p> <p>No evidence of associations between high strain, active job, passive job, versus low strain, and risk of overall cancer and of each cancer type</p>                                                             |                                      |                                          |                             |                                                       |
| Heikkila     | 2020             | 30          | <p>Men: 1.59 (1.12-2.28), heterogeneity: <math>I^2=44.8\%</math><br/> Women: 1.15 (0.80-1.66), heterogeneity: <math>I^2=0.0\%</math><br/> No gender difference</p>                                                                                                                     | <p>Unadjusted: 1.25 (1.04-1.50), heterogeneity: <math>I^2=0.0\%</math></p> <p>Adjustment for age, sex, and lifestyle-related covariates: 1.41 (1.11-1.80), heterogeneity: <math>I^2=26.9\%</math></p> <p>No difference according to baseline smoking status</p> <p>Significant difference according to SES (<math>p=0.046</math>):<br/> --- low SES: 1.30 (0.97-1.76), heterogeneity: <math>I^2=5.3\%</math><br/> --- intermediate SES: 1.08 (0.77-1.50), heterogeneity: <math>I^2=0.0\%</math><br/> --- high SES: 2.77 (1.35-5.71), heterogeneity: <math>I^2=10.5\%</math></p> | Adjustment for age and sex           | Random effects model                     | No                          | No                                                    |
| Heikkila     | 2012             | 31          | <p>Cross-sectional associations based on the pooled individual-level data, stratified by gender and adjusted for age and SES (10 studies), with job strain as outcome:<br/> --- men: smokers: 1.13 (1.07-1.20)<br/> --- women: smokers: 1.06 (1.00-1.11)<br/> No gender difference</p> | <p>Cross-sectional associations in subgroups (10 studies, pooled individual-level data): significant small differences in the associations according to age and SES groups</p>                                                                                                                                                                                                                                                                                                                                                                                                  | Adjusted for age, sex and SES        | Random effects model                     | No                          | No                                                    |
| Heikkila     | 2012             | 32          | <p>Cross-sectional associations based on the pooled individual-level data, stratified by gender and adjusted for age and SES (8 studies), with job</p>                                                                                                                                 | <p>Cross-sectional associations in subgroups (8 studies, pooled individual-level data): lower odds of job strain for those aged 50 or older, no clear pattern</p>                                                                                                                                                                                                                                                                                                                                                                                                               | Adjusted for age, sex and SES        | Random effects model                     | No                          | No                                                    |

| First author | Publication date | Ref. number | Gender differences                                                                                                                                                                                                                                                                   | Results from other subgroup/sensitivity analyses                                                                                                                                                              | Adjustment variables of main results | Statistical methods for pooled estimates                                                              | Publication bias assessment                                                      | Quality assessment of primary studies and/or evidence |
|--------------|------------------|-------------|--------------------------------------------------------------------------------------------------------------------------------------------------------------------------------------------------------------------------------------------------------------------------------------|---------------------------------------------------------------------------------------------------------------------------------------------------------------------------------------------------------------|--------------------------------------|-------------------------------------------------------------------------------------------------------|----------------------------------------------------------------------------------|-------------------------------------------------------|
|              |                  |             | strain as outcome:<br>--- men: intermediate drinkers:<br>0.96 (0.87-1.07)<br>--- women: intermediate drinkers:<br>0.91 (0.81-1.03)<br>No gender difference<br>--- men: heavy drinkers:<br>1.17 (1.08-1.26)<br>--- women: heavy drinkers:<br>1.02 (0.93-1.13)<br>No gender difference | of the odds of job strain according to socioeconomic position                                                                                                                                                 |                                      |                                                                                                       |                                                                                  |                                                       |
| Heikkila     | 2014             | 33          |                                                                                                                                                                                                                                                                                      | Adjusted for age, sex, SES, smoking, and BMI:<br>--- Crohn's disease: 0.83 (0.48-1.43), heterogeneity: I <sup>2</sup> =0.0%<br>--- Ulcerative colitis: 1.06 (0.76-1.48), heterogeneity: I <sup>2</sup> =19.7% | Age and sex-adjusted                 | Random effects model                                                                                  | No                                                                               | No                                                    |
| Huang        | 2015             | 34          | Men (3 studies): 1.26 (0.69–2.27)<br>Women (5 studies): 1.33 (1.04–1.69)<br>No gender difference                                                                                                                                                                                     | Significant association with high strain after exclusion of the only study with unadjusted results: 1.24 (1.01-1.53) for all stroke                                                                           | None and any adjustment              | Fixed effects model when no significant heterogeneity between studies, otherwise random-effects model | Yes<br>No evidence of publication bias according to funnel plots and Egger tests | Yes<br>Newcastle-Ottawa Quality Assessment Scale      |
| Kang         | 2012             | 35          | Men (6 studies): 1.37 (0.96-1.96)<br>Women (2 studies): not provided                                                                                                                                                                                                                 | Case-control (6 studies):<br>1.43 (1.00-2.03)<br>Cohort (5 studies):<br>1.41 (1.12-1.77)<br><br>Long working hours defined as up to 55 hours a week (9 studies):<br>1.29 (0.99-1.66)                          | Any adjustment                       | Random effects model when p<0.10 for heterogeneity between studies, otherwise fixed-effects model     | Yes<br>No evidence of publication bias according to Egger's test                 | No                                                    |
| Kim          | 2016             | 36          |                                                                                                                                                                                                                                                                                      | Unadjusted model (1 study):<br>1.56 (1.40–1.73)<br><br>Adjusted model (5 studies):                                                                                                                            | None or any adjustment               | Random effects model when expected significant                                                        | Yes<br>No evidence of publication bias according to                              | No                                                    |

| First author                          | Publication date | Ref. number | Gender differences   | Results from other subgroup/sensitivity analyses                                                                                                                                                                                                                                                                                          | Adjustment variables of main results   | Statistical methods for pooled estimates                     | Publication bias assessment  | Quality assessment of primary studies and/or evidence |
|---------------------------------------|------------------|-------------|----------------------|-------------------------------------------------------------------------------------------------------------------------------------------------------------------------------------------------------------------------------------------------------------------------------------------------------------------------------------------|----------------------------------------|--------------------------------------------------------------|------------------------------|-------------------------------------------------------|
|                                       |                  |             |                      | 1.23 (1.01–1.50), heterogeneity: $I^2=83\%$<br><br>Higher ORs in Europe, younger participants, with an exposure-outcome time lag between 3 and 4 years                                                                                                                                                                                    |                                        | heterogeneity between studies, otherwise fixed-effects model | Begg's test and Egger's test |                                                       |
| Kivimaki                              | 2013             | 37          |                      | Adjusted for age, sex, cohort, and lifestyle factors: 1.21 (1.03–1.43)                                                                                                                                                                                                                                                                    | Adjusted for age, sex, and cohort      | Cox regression model using pooled individual-level data      | No                           | No                                                    |
| Kivimaki<br>Update of Kivimaki E 2014 | 2015             | 38          |                      |                                                                                                                                                                                                                                                                                                                                           | -                                      |                                                              | No                           | No                                                    |
| Kivimaki<br>Idem Steptoe ARPH 2013    | 2014             | 39          |                      |                                                                                                                                                                                                                                                                                                                                           |                                        |                                                              | No                           | No                                                    |
| Kivimaki<br>Not in the extraction     | 2018             | 40          |                      | Adjusted for age, sex, cohort, SES, smoking, high alcohol intake, body mass index, and leisure-time physical inactivity:<br>--- Venous thromboembolism: 1.5 (1.1-2.2)<br>--- Deep-vein thrombosis: 1.7 (1.1-2.6)<br>--- Pulmonary embolism: 1.4 (0.8-2.4)                                                                                 | Adjusted for age, sex, cohort, and SES | Prospective multi-cohort study from individual-level data    | No                           | No                                                    |
| Kivimaki                              | 2017             | 41          | No gender difference | Adjusted for age, sex, SES, and lifestyle-related factors (7 studies): 1.41 (1.10-1.80), heterogeneity: $I^2=0\%$<br><br>Adjusted for age, sex, SES, and pre-existing coronary heart disease at the time of atrial fibrillation diagnosis: 1.41 (1.12-1.78)<br><br>Adjusted for age, sex, and SES results stratified by method of outcome | Adjusted for age, sex and SES          | Random effects model                                         | No                           | No                                                    |

| First author | Publication date | Ref. number | Gender differences                                                                                                                                          | Results from other subgroup/sensitivity analyses                                                                                                                                                                                                                                                                                                                                                                                                                                                                                                                                                                                               | Adjustment variables of main results | Statistical methods for pooled estimates | Publication bias assessment | Quality assessment of primary studies and/or evidence |
|--------------|------------------|-------------|-------------------------------------------------------------------------------------------------------------------------------------------------------------|------------------------------------------------------------------------------------------------------------------------------------------------------------------------------------------------------------------------------------------------------------------------------------------------------------------------------------------------------------------------------------------------------------------------------------------------------------------------------------------------------------------------------------------------------------------------------------------------------------------------------------------------|--------------------------------------|------------------------------------------|-----------------------------|-------------------------------------------------------|
|              |                  |             |                                                                                                                                                             | <p>assessment:<br/>           --- Electronic health records (hospitalisation, death) (5 studies): 1.65 (1.03-2.66), heterogeneity: <math>I^2=0\%</math><br/>           --- Electronic health records (hospitalisation, death, drug reimbursement register) (3 studies): 1.32 (0.93-1.88), heterogeneity: <math>I^2=0\%</math><br/>           --- Electrocardiogram (1 study): 1.41 (0.93-2.14)</p> <p>No difference according to age and SES groups</p>                                                                                                                                                                                        |                                      |                                          |                             |                                                       |
| Kivimaki     | 2015             | 42          |                                                                                                                                                             | <p>Weight gain (4 studies), fixed-effect meta-analysis: 1.04 (0.99-1.09)</p> <p>Obesity (4 studies), fixed-effect meta-analysis: 1.00 (0.89-1.13)</p>                                                                                                                                                                                                                                                                                                                                                                                                                                                                                          | Adjusted for age, sex and SES        | Fixed and random effects models          | No                          | No                                                    |
| Kivimaki     | 2012             | 43          | <p>Men, adjusted for age and sex: 1.29 (1.13-1.48)<br/>           Women, adjusted for age and sex: 1.46 (1.07-1.99)<br/>           No gender difference</p> | <p>Adjusted for age and sex: 1.23 (1.10-1.37), heterogeneity: <math>I^2&lt;0.1\%</math></p> <p>Adjusted for age, sex, SES, and lifestyle factors (7 studies): 1.21 (1.03-1.44)</p> <p>Adjusted for age, sex, SES, and Framingham score (4 studies): 1.42 (1.16-1.74)</p> <p>Slightly stronger association after exclusion of CHD cases at the first 3 years and 5 years of follow-up in order to minimise reverse causality</p> <p>Few differences in the association between studies from Nordic countries, continental Europe, and the UK</p> <p>Significant association in all levels of SES</p> <p>Comparison of age- and sex-adjusted</p> | Adjusted for sex, age and SES        | Random effects model                     | No                          | No                                                    |

| First author | Publication date | Ref. number | Gender differences                                                                                                                                                                                                                                     | Results from other subgroup/sensitivity analyses                                                                                                                                                                                                                                                                                                                                                                                                                                                                                                                                                                                                                                        | Adjustment variables of main results | Statistical methods for pooled estimates | Publication bias assessment                                                                                                                      | Quality assessment of primary studies and/or evidence |
|--------------|------------------|-------------|--------------------------------------------------------------------------------------------------------------------------------------------------------------------------------------------------------------------------------------------------------|-----------------------------------------------------------------------------------------------------------------------------------------------------------------------------------------------------------------------------------------------------------------------------------------------------------------------------------------------------------------------------------------------------------------------------------------------------------------------------------------------------------------------------------------------------------------------------------------------------------------------------------------------------------------------------------------|--------------------------------------|------------------------------------------|--------------------------------------------------------------------------------------------------------------------------------------------------|-------------------------------------------------------|
|              |                  |             |                                                                                                                                                                                                                                                        | <p>results according to publication status<br/> --- published: (3 studies) :<br/> 1.43 (1.15-1.77)<br/> --- unpublished: (10 studies):<br/> 1.16 (1.02-1.32)</p> <p>Age- and sex-adjusted results for job strain categories:<br/> Passive: 1.12 (0.99-1.27)<br/> Active: 1.06 (0.94-1.19)<br/> High strain: 1.28 (1.11-1.48)</p>                                                                                                                                                                                                                                                                                                                                                        |                                      |                                          |                                                                                                                                                  |                                                       |
| Kivimaki     | 2015             | 44          | <p>Adjusted for age and SES:<br/> --- Coronary heart disease<br/> Men: 1.09 (0.94-1.26)<br/> Women: 1.20 (0.89-1.63)<br/> No gender difference</p> <p>--- Stroke<br/> Men: 1.29 (1.04-1.60)<br/> Women: 1.63 (1.10-2.43)<br/> No gender difference</p> | <p>High quality studies, adjusted for age, sex and SES:<br/> --- coronary heart disease:<br/> 1.17 (0.99–1.39)<br/> --- stroke: 1.32 (0.99–1.76),<br/> heterogeneity: I<sup>2</sup>=0%</p> <p>No significant difference according to age, SES, geographical region, method of outcome ascertainment, and publication status</p>                                                                                                                                                                                                                                                                                                                                                         | Adjusted for age, sex, and SES       | Random effects model                     | Yes<br>A funnel plot of published studies on long working hours and incident coronary heart disease did not provide evidence of publication bias | Yes<br>Cochrane risk-of-bias tool for cohort studies  |
| Kivimaki     | 2015             | 45          | <p>Men: 0.98 (0.83-1.16)<br/> Women: 1.16 (0.92-1.47)<br/> No gender difference</p>                                                                                                                                                                    | <p>No difference according to publication status:<br/> --- published (4 studies):<br/> 1.18 (0.60–2.32), heterogeneity: I<sup>2</sup>=76%<br/> --- unpublished (19 studies):<br/> 1.05 (0.87–1.25), heterogeneity: I<sup>2</sup>=47%</p> <p>No significant difference according to method of diabetes ascertainment, length of follow-up, study location, age group, or obesity status</p> <p>Significant differences according to SES group (adjusted for age and sex):<br/> --- low: 1.29 (1.06-1.57), heterogeneity: I<sup>2</sup>=0%<br/> --- intermediate: 1.13 (0.88-1.44), heterogeneity: I<sup>2</sup>=0%<br/> --- high: 1.00 (0.80-1.25), heterogeneity: I<sup>2</sup>=15%</p> | Adjusted for age and sex             | Random effects model                     | Yes<br>No difference according to publication status (published versus unpublished)                                                              | No                                                    |

| First author | Publication date | Ref. number | Gender differences                                                                                                                                                                                          | Results from other subgroup/sensitivity analyses                                                                                                                                                                                                                                                      | Adjustment variables of main results      | Statistical methods for pooled estimates | Publication bias assessment                                                                                                                                                                                                                | Quality assessment of primary studies and/or evidence |
|--------------|------------------|-------------|-------------------------------------------------------------------------------------------------------------------------------------------------------------------------------------------------------------|-------------------------------------------------------------------------------------------------------------------------------------------------------------------------------------------------------------------------------------------------------------------------------------------------------|-------------------------------------------|------------------------------------------|--------------------------------------------------------------------------------------------------------------------------------------------------------------------------------------------------------------------------------------------|-------------------------------------------------------|
| Kivimaki     | 2006             | 46          |                                                                                                                                                                                                             | Multiple adjusted:<br>--- job strain (10 studies):<br>1.16 (0.94–1.43), heterogeneity:<br>Q=15.4, p=0.12<br>--- effort-reward imbalance (4 studies):<br>2.05 (0.97–4.32), heterogeneity: Q=6.4,<br>p=0.04<br>--- organizational injustice (2 studies):<br>1.47 (1.12–1.95), heterogeneity: not tested | Age- and gender-adjusted                  | Random effects model                     | Yes<br>Some evidence for publication bias as shown by funnel plot asymmetry                                                                                                                                                                | No                                                    |
| Kraatz       | 2013             | 47          |                                                                                                                                                                                                             |                                                                                                                                                                                                                                                                                                       | Adjusted for at least one physical factor | Random effects model                     | No                                                                                                                                                                                                                                         | Yes                                                   |
| Lang         | 2012             | 48          |                                                                                                                                                                                                             |                                                                                                                                                                                                                                                                                                       |                                           | Random effects model                     | Yes<br>The statistical test for publication bias was significant for the lagged effect of low social support on lower extremity problems. Statistical Egger's tests provided no evidence for publication bias, for all other relationships | Yes                                                   |
| Li           | 2020             | 49          | No gender difference<br><br>Results from cohort studies for working hours $\geq$ 55 h/week:<br><br>--- incidence (p=0.99)<br>Men: 1.20 (0.80-1.82)<br>Women: 1.21 (0.77-1.91)<br><br>--- mortality (p=0.99) | Working hours 41-48 h/week:<br>--- incidence (2 case-control studies):<br>0.26 (0.13-0.49), heterogeneity: $I^2=0\%$<br><br>Working hours 49-54 h/week:<br>--- incidence (2 case-control studies):<br>0.23 (0.09-0.59), heterogeneity: $I^2=0\%$<br><br>Working hours $\geq$ 55 h/week:               | Adjusted for at least age, sex, and SES   | Random effects model                     | Yes<br>No serious concerns for publication bias according to funnel plots                                                                                                                                                                  | Yes<br>Navigation Guide, GRADE                        |

| First author                        | Publication date | Ref. number | Gender differences                                                                                                                                                                               | Results from other subgroup/sensitivity analyses                                                                                                                                                                                                                                                                                                                                                                                                                                                | Adjustment variables of main results                                                                     | Statistical methods for pooled estimates | Publication bias assessment                                              | Quality assessment of primary studies and/or evidence |
|-------------------------------------|------------------|-------------|--------------------------------------------------------------------------------------------------------------------------------------------------------------------------------------------------|-------------------------------------------------------------------------------------------------------------------------------------------------------------------------------------------------------------------------------------------------------------------------------------------------------------------------------------------------------------------------------------------------------------------------------------------------------------------------------------------------|----------------------------------------------------------------------------------------------------------|------------------------------------------|--------------------------------------------------------------------------|-------------------------------------------------------|
|                                     |                  |             | Men: 1.21 (0.97-1.52)<br>Women: 1.21 (0.77-1.91)                                                                                                                                                 | --- incidence (2 case-control studies):<br>0.74 (0.41-1.34), heterogeneity: I <sup>2</sup> =0%<br><br>Stronger associations in lower SES subgroup (incidence p=0.05, mortality p=0.05)<br><br>No difference according to WHO region, outcome measurement, and risk of bias status                                                                                                                                                                                                               |                                                                                                          |                                          |                                                                          |                                                       |
| Linton<br><br>Not in the extraction | 2015             | 50          |                                                                                                                                                                                                  |                                                                                                                                                                                                                                                                                                                                                                                                                                                                                                 | Least adjusted                                                                                           | Random effects model                     | No                                                                       | Yes<br>GRADE                                          |
| Madsen                              | 2017             | 51          | Sex-stratified results from unpublished studies:<br>Men (11 studies): 1.21 (0.92-1.60)<br>Women (11 studies): 1.30 (1.04-1.63)<br>No gender difference                                           | High-quality published studies, adjusted for sex, age, marital status, and education: 1.78 (1.46–2.17)<br><br>Unpublished studies:<br>--- similar estimates across age and SES subgroups<br>--- after additional adjustment for baseline depressive symptoms (as a continuous score), the association disappeared: 1.03 (0.81–1.32)<br>--- using the four quadrants of job strain, the risk of clinical depression was increased in job strain and passive work groups compared with low strain | Any adjustment (published studies)<br>Adjusted for age, sex, cohabitation, and SES (unpublished studies) | Random effects model                     | No                                                                       | Yes<br>Newcastle-Ottawa Quality Assessment Scale      |
| Magnavita                           | 2019             | 52          |                                                                                                                                                                                                  |                                                                                                                                                                                                                                                                                                                                                                                                                                                                                                 | Any adjustment                                                                                           | Random effects model                     | Yes<br>Asymmetric funnel plot indicated the presence of publication bias | Yes<br>Newcastle-Ottawa scales (NOS, NOS-A)           |
| Milner                              | 2018             | 53          | Some evidence of gender differences<br><br>Associations with suicide death in men only:<br>Low support: 1.09 (0.89-1.33), heterogeneity: I <sup>2</sup> =98.6%<br>Low control: 1.29 (1.19-1.40), |                                                                                                                                                                                                                                                                                                                                                                                                                                                                                                 | Unadjusted                                                                                               | Random effects model                     | Yes<br>Potential publication bias                                        | No                                                    |

| First author   | Publication date | Ref. number | Gender differences                                                                                                                                                                                                                                                | Results from other subgroup/sensitivity analyses                                                                                                                                                                                                  | Adjustment variables of main results | Statistical methods for pooled estimates | Publication bias assessment                                                                                                                               | Quality assessment of primary studies and/or evidence |
|----------------|------------------|-------------|-------------------------------------------------------------------------------------------------------------------------------------------------------------------------------------------------------------------------------------------------------------------|---------------------------------------------------------------------------------------------------------------------------------------------------------------------------------------------------------------------------------------------------|--------------------------------------|------------------------------------------|-----------------------------------------------------------------------------------------------------------------------------------------------------------|-------------------------------------------------------|
|                |                  |             | heterogeneity: $I^2=100\%$<br>Job demands: 1.16 (0.57-2.37),<br>heterogeneity: $I^2=88.5\%$                                                                                                                                                                       |                                                                                                                                                                                                                                                   |                                      |                                          |                                                                                                                                                           |                                                       |
| Milner         | 2019             | 54          | Gender did not influence the results                                                                                                                                                                                                                              | Study design, choice of outcome, and country of study did not influence the results<br><br>High-quality studies (quality score $\geq 5$ ): results in the same direction but reduced in significance                                              | Any adjustment                       | Random effects model                     | Yes                                                                                                                                                       | Yes<br>Newcastle-Ottawa Quality Assessment Scale      |
| Nielsen        | 2020             | 55          | Cross-sectional studies:<br>--- Men: 3.04 (1.79-5.17),<br>heterogeneity: $I^2=81.0\%$<br>--- Women: 2.55 (1.50-4.33),<br>heterogeneity: $I^2=91.5\%$<br>No gender difference                                                                                      |                                                                                                                                                                                                                                                   |                                      |                                          | Yes<br>No publication bias according to four indicators (funnel plot, Orwin's Fail-Safe N, Duval and Tweedie's trim and fill procedure, and Egger's test) | Yes<br>GRADE                                          |
| Nieuwenhuijsen | 2010             | 56          | Low job control:<br>--- Men: 1.24 (1.09-1.41)<br>--- Women: 1.18 (0.97-1.44)<br><br>Low co-worker support:<br>--- Men: 1.27 (1.13-1.43)<br>--- Women: 1.18 (0.99-1.41)<br><br>Low supervisor support:<br>--- Men: 1.25 (1.05-1.49)<br>--- Women: 1.11 (0.96-1.30) |                                                                                                                                                                                                                                                   | Any adjustment                       | Fixed effects models                     | No                                                                                                                                                        | Yes<br>All included studies were of high quality      |
| Nyberg         | 2014             | 57          | No gender difference<br>Men: 1.19 (1.06-1.34)<br>Women: 1.13 (1.00-1.28)                                                                                                                                                                                          | Adjusted for age, sex, SES, and lifestyle variables (BMI, physical activity, smoking status, and alcohol consumption): 1.11 (1.00-1.23)<br><br>After exclusion of the first 3 years of follow-up, adjusted for age, sex and SES: 1.15 (1.06-1.25) | Adjusted for age, sex, and SES       | Fixed effects model                      | No                                                                                                                                                        | No                                                    |

| First author | Publication date | Ref. number | Gender differences                                                 | Results from other subgroup/sensitivity analyses                                                                                                                                                                                                                                                                                                                                                                                                                                                                                                                                                                                                                                                                                                                                                                                                                                                                                                                       | Adjustment variables of main results | Statistical methods for pooled estimates                                                                                                                                                             | Publication bias assessment | Quality assessment of primary studies and/or evidence |
|--------------|------------------|-------------|--------------------------------------------------------------------|------------------------------------------------------------------------------------------------------------------------------------------------------------------------------------------------------------------------------------------------------------------------------------------------------------------------------------------------------------------------------------------------------------------------------------------------------------------------------------------------------------------------------------------------------------------------------------------------------------------------------------------------------------------------------------------------------------------------------------------------------------------------------------------------------------------------------------------------------------------------------------------------------------------------------------------------------------------------|--------------------------------------|------------------------------------------------------------------------------------------------------------------------------------------------------------------------------------------------------|-----------------------------|-------------------------------------------------------|
|              |                  |             |                                                                    | No difference according to age and method of diabetes ascertainment                                                                                                                                                                                                                                                                                                                                                                                                                                                                                                                                                                                                                                                                                                                                                                                                                                                                                                    |                                      |                                                                                                                                                                                                      |                             |                                                       |
| Nyberg       | 2012             | 58          | No gender difference in cross-sectional associations               | <p>Cross-sectional associations adjusted for age and sex (13 studies):</p> <ul style="list-style-type: none"> <li>--- Obese class I (<math>30 \leq \text{BMI} &lt; 35 \text{ kg/m}^2</math>): 1.19 (1.13-25)</li> <li>--- Obese classes II/III (<math>\text{BMI} \geq 35 \text{ kg/m}^2</math>): 1.30 (1.16-1.46)</li> <li>--- Obesity (<math>\text{BMI} \geq 30 \text{ kg/m}^2</math>): 1.22 (1.16-1.28)</li> </ul> <p>Cross-sectional associations:</p> <ul style="list-style-type: none"> <li>- Further adjustment for smoking had no effect on the estimates</li> <li>- No difference in cross-sectional associations in participants younger and older than 50 years of age</li> <li>- Unchanged results when the analyses were performed separately for clinically measured versus self-reported BMI</li> </ul> <p>Prospective associations:<br/>Adjustment for the length of follow-up had essentially no effect on the longitudinal association estimates.</p> | Adjusted for age, sex, and SES       | Cross-sectional data: 2-stage random effects meta-analysis<br>Subgroup differences and prospective associations: 1-stage meta-analysis pooling all available individual-level data into one data set | No                          | No                                                    |
| Nyberg       | 2013             | 59          | No significant interaction between sex and job strain for diabetes |                                                                                                                                                                                                                                                                                                                                                                                                                                                                                                                                                                                                                                                                                                                                                                                                                                                                                                                                                                        | Adjusted for age, sex, and SES       | Cross-sectional study individual-level data from the studies were pooled into one dataset to be analyzed using mixed effects linear and logistic regression models with                              | No                          | No                                                    |

| First author                    | Publication date | Ref. number | Gender differences                                                                                | Results from other subgroup/sensitivity analyses                                                                                                                                                                                                                              | Adjustment variables of main results           | Statistical methods for pooled estimates                                                                                | Publication bias assessment                                                                                                                  | Quality assessment of primary studies and/or evidence |
|---------------------------------|------------------|-------------|---------------------------------------------------------------------------------------------------|-------------------------------------------------------------------------------------------------------------------------------------------------------------------------------------------------------------------------------------------------------------------------------|------------------------------------------------|-------------------------------------------------------------------------------------------------------------------------|----------------------------------------------------------------------------------------------------------------------------------------------|-------------------------------------------------------|
|                                 |                  |             |                                                                                                   |                                                                                                                                                                                                                                                                               |                                                | the study as the random effect                                                                                          |                                                                                                                                              |                                                       |
| Palmer<br>Not in the extraction | 2013             | 60          | Not applicable                                                                                    | High-quality studies (excluding studies with a higher potential for bias or confounding, or which reported incompletely):<br>--- Preterm delivery (11 studies): 1.18 (1.05-1.33)<br>--- Small for gestational age (6 studies): 0.99 (0.88-1.11)                               |                                                | Fixed effects model when no significant heterogeneity between studies ( $p \geq 0.10$ ), otherwise random-effects model | Yes<br>Risk estimates were lower in the largest and better studies, with outliers confined to small studies, suggesting publication bias     | Yes                                                   |
| Rönblad                         | 2019             | 61          |                                                                                                   | Dose-response associations for depressive symptoms and anxiety<br>Meta-analyses were reperformed using the most adjusted models provided in each study showed only marginal decreases in effect sizes and did not alter any conclusions                                       | Stratified or adjusted for gender, age and SES | Random effects model                                                                                                    | Yes<br>Funnel plots did not show significant skewedness                                                                                      | Yes<br>GRADE                                          |
| Rudkjoebing                     | 2020             | 62          |                                                                                                   |                                                                                                                                                                                                                                                                               | Stratified or adjusted for gender, age and SES | Random effects model                                                                                                    | Yes<br>Publication bias was considered as unlikely according to funnel plot                                                                  | Yes                                                   |
| Rugulies                        | 2017             | 63          |                                                                                                   | All studies, based on the most adjusted risk estimates of each study: 1.49 (1.23–1.80), heterogeneity: $I^2=59.4\%$<br><br>The pooled estimates were similar in all stratified analyses according to study quality, ERI ascertainment, and depressive disorders ascertainment | Least adjusted                                 | Random effects model                                                                                                    | Yes<br>Funnel plot skewed to the right, which could be an indication of publication bias, Egger's test did not indicate any publication bias | Yes<br>Newcastle-Ottawa Quality Assessment Scale      |
| Stansfeld                       | 2006             | 64          | Sex-stratified results for job demands:<br>--- Men: 1.55 (1.29-1.85), heterogeneity: $I^2=70.7\%$ |                                                                                                                                                                                                                                                                               | Most highly adjusted                           | Random effects model                                                                                                    | No                                                                                                                                           | No                                                    |

| First author                                                         | Publication date | Ref. number | Gender differences                                                                                                                                                                                                                                                                                                                                                                                                                                                                                                                                                                                                                                                                          | Results from other subgroup/sensitivity analyses                                                            | Adjustment variables of main results | Statistical methods for pooled estimates | Publication bias assessment                                 | Quality assessment of primary studies and/or evidence |
|----------------------------------------------------------------------|------------------|-------------|---------------------------------------------------------------------------------------------------------------------------------------------------------------------------------------------------------------------------------------------------------------------------------------------------------------------------------------------------------------------------------------------------------------------------------------------------------------------------------------------------------------------------------------------------------------------------------------------------------------------------------------------------------------------------------------------|-------------------------------------------------------------------------------------------------------------|--------------------------------------|------------------------------------------|-------------------------------------------------------------|-------------------------------------------------------|
|                                                                      |                  |             | <p>--- Women: 1.34 (1.16-1.53), heterogeneity: I<sup>2</sup>=0%</p> <p>Sex-stratified results for low social support:</p> <p>--- Men: 1.38 (1.20-1.60), heterogeneity: I<sup>2</sup>=71.8%</p> <p>--- Women: 1.20 (1.07-1.35), heterogeneity: I<sup>2</sup>=0%</p>                                                                                                                                                                                                                                                                                                                                                                                                                          |                                                                                                             |                                      |                                          |                                                             |                                                       |
| Steptoe<br>Not in the extraction<br>Update of Kivimäki<br>SJWEH 2006 | 2012             | 65          |                                                                                                                                                                                                                                                                                                                                                                                                                                                                                                                                                                                                                                                                                             |                                                                                                             | Adjusted for age and sex             | Random effects model                     | No                                                          | No                                                    |
| Sui                                                                  | 2016             | 66          | <p>Sex-stratified results:</p> <p>Job demands:</p> <p>--- Men (3 studies): 0.82 (0.52-1.28), heterogeneity: I<sup>2</sup>=72%</p> <p>--- Women (3 studies): 1.12 (0.83-1.51), heterogeneity: I<sup>2</sup>=0%</p> <p>Low social support:</p> <p>--- Men (3 studies): 0.88 (0.71-1.09), heterogeneity: I<sup>2</sup>=0%</p> <p>--- Women (3 studies): 1.64 (0.99-2.72), heterogeneity: I<sup>2</sup>=0%</p> <p>Job strain:</p> <p>--- Men (4 studies): 0.88 (0.59-1.33), heterogeneity: I<sup>2</sup>=78%</p> <p>--- Women (4 studies): 1.22 (1.01-1.46), heterogeneity: I<sup>2</sup>=28%</p> <p>No gender difference for demands, support, and job strain in association with diabetes</p> |                                                                                                             | Most fully adjusted                  | Random effects model                     | Yes<br>No publication bias was detected using a funnel plot | Yes<br>Newcastle-Ottawa Quality Assessment Scale      |
| Szerencsi                                                            | 2012             | 67          |                                                                                                                                                                                                                                                                                                                                                                                                                                                                                                                                                                                                                                                                                             | Differences according to study characteristics, including country of study, assessment methods for exposure |                                      | Random effects model                     | Yes<br>Visual inspection of the funnel plot                 | Yes                                                   |

| First author | Publication date | Ref. number | Gender differences                                                                                                                                                                                                                                                                                                                                                                                                                                                                                                                                                                                                                                                                                                                                                                                                                                                                                                                       | Results from other subgroup/sensitivity analyses                                                                                                                                                                                                                                                                                                                                                                                                                                                                                                                       | Adjustment variables of main results | Statistical methods for pooled estimates | Publication bias assessment                                                                                                                                                             | Quality assessment of primary studies and/or evidence     |
|--------------|------------------|-------------|------------------------------------------------------------------------------------------------------------------------------------------------------------------------------------------------------------------------------------------------------------------------------------------------------------------------------------------------------------------------------------------------------------------------------------------------------------------------------------------------------------------------------------------------------------------------------------------------------------------------------------------------------------------------------------------------------------------------------------------------------------------------------------------------------------------------------------------------------------------------------------------------------------------------------------------|------------------------------------------------------------------------------------------------------------------------------------------------------------------------------------------------------------------------------------------------------------------------------------------------------------------------------------------------------------------------------------------------------------------------------------------------------------------------------------------------------------------------------------------------------------------------|--------------------------------------|------------------------------------------|-----------------------------------------------------------------------------------------------------------------------------------------------------------------------------------------|-----------------------------------------------------------|
|              |                  |             |                                                                                                                                                                                                                                                                                                                                                                                                                                                                                                                                                                                                                                                                                                                                                                                                                                                                                                                                          | and outcome, and some adjustment factors                                                                                                                                                                                                                                                                                                                                                                                                                                                                                                                               |                                      |                                          | indicates the presence of bias since smaller studies (less precision) showing no effects are missing. The Egger test confirms the finding of bias (P=0.004)                             |                                                           |
| Taouk        | 2020             | 68          | <p>Sex-stratified results:</p> <p>Low job control<br/> --- minimally adjusted analysis:<br/> Men (3 studies): 1.36 (1.16-1.58), heterogeneity: I<sup>2</sup>=0.0%<br/> Women (1 study): 1.21 (0.83-1.76), heterogeneity: not applicable<br/> --- multivariable-adjusted analysis<br/> Men (2 studies): 1.16 (0.97-1.39), heterogeneity: I<sup>2</sup>=0.0%<br/> Women (1 study): no study</p> <p>High job demands<br/> --- minimally adjusted analysis:<br/> Men (3 studies): 0.97 (0.55-1.72), heterogeneity: I<sup>2</sup>=72.3%<br/> Women (1 study): 0.56 (0.39-0.86), heterogeneity: not applicable</p> <p>Job strain<br/> --- minimally adjusted analysis:<br/> Men (3 studies): 1.37 (0.75-2.50), heterogeneity: I<sup>2</sup>=73.0%<br/> Women (3 studies): 0.85 (0.53-1.37), heterogeneity: I<sup>2</sup>=0.0%<br/> --- multivariable-adjusted analysis<br/> Men (1 study): 1.03 (0.75-1.41), heterogeneity: not applicable</p> | <p>Low job control, multivariable-adjusted analysis (6 studies): 1.23 (1.17-1.30), heterogeneity: I<sup>2</sup>=0.0%</p> <p>Job strain, multivariable-adjusted analysis: 1.26 (0.82-1.94), heterogeneity: I<sup>2</sup>=35.0%</p> <p>Excluding studies with low quality assessment resulted in attenuated pooled estimates and wider confidence intervals. However, the association between low job control and CHD mortality remained the same:<br/> --- minimally adjusted analysis: 1.36 (1.19-1.56)<br/> --- multivariable-adjusted analysis: 1.19 (1.01-1.40)</p> | Minimally-adjusted                   | Random effects model                     | Yes<br>Funnel plots suggested some degree of asymmetry (publication bias), however the Egger's tests did not detect strong evidence of small study effects and risk of publication bias | Yes<br>Scottish Intercollegiate Guidelines Network (SIGN) |

| First author                                           | Publication date | Ref. number | Gender differences                                                                                                                                                                     | Results from other subgroup/sensitivity analyses                                                                                                                                                | Adjustment variables of main results          | Statistical methods for pooled estimates | Publication bias assessment                                                                                                                                                                                                                                                                      | Quality assessment of primary studies and/or evidence                               |
|--------------------------------------------------------|------------------|-------------|----------------------------------------------------------------------------------------------------------------------------------------------------------------------------------------|-------------------------------------------------------------------------------------------------------------------------------------------------------------------------------------------------|-----------------------------------------------|------------------------------------------|--------------------------------------------------------------------------------------------------------------------------------------------------------------------------------------------------------------------------------------------------------------------------------------------------|-------------------------------------------------------------------------------------|
|                                                        |                  |             | Women (1 study): 0.84 (0.35-2.04), heterogeneity: not applicable                                                                                                                       |                                                                                                                                                                                                 |                                               |                                          |                                                                                                                                                                                                                                                                                                  |                                                                                     |
| Theorell<br><br>Not in the extraction                  | 2015             | 69          |                                                                                                                                                                                        |                                                                                                                                                                                                 | Adjusted for age and gender<br>Least adjusted | Fixed effects models                     | Yes<br>No evidence of publication bias based on funnel plots                                                                                                                                                                                                                                     | Yes<br>GRADE                                                                        |
| van der Molen<br><br>Update of Nieuwenhuijs en OM 2010 | 2020             | 70          | No gender difference in associations for:<br>- Effort-reward imbalance<br>- Low procedural justice<br>- Low relational justice<br>- High emotional demands<br>- Low decision authority |                                                                                                                                                                                                 | Any adjustment                                | Random effects model                     | Yes<br>Visual checking of the funnel plots suggested no serious publication bias for effort-reward imbalance, low procedural justice, low relational justice and low support (coworker, supervisor, or combined). Publication bias could not be assessed for the other psychosocial work factors | Yes<br>Quality of included studies<br>Quality of evidence using the GRADE framework |
| Van Melick                                             | 2014             | 71          | Not applicable                                                                                                                                                                         | Case-control (3 studies): 1.08 (0.92-1.28), heterogeneity: I <sup>2</sup> =0%<br>Cohort (8 studies): 1.35 (0.98-1.87), heterogeneity: I <sup>2</sup> =69%<br>No difference between study design | Most adjusted                                 | Random effects model                     | No                                                                                                                                                                                                                                                                                               | Yes<br>Scottish Intercollegiate Guidelines Network (SIGN)                           |
| Virtanen                                               | 2012             | 72          | Only men (7 studies): 2.07 (1.51-2.85)<br><br>Women with or without men (5 studies): 1.43 (1.05-1.93)                                                                                  | Minimally adjusted (at least controlled for age and sex): 1.80 (1.42-2.29), heterogeneity: I <sup>2</sup> =61.9%<br><br>Maximally adjusted (5 studies): 1.59 (1.23-2.07)                        | Minimally adjusted and SES                    | Random effects model                     | Yes<br>The funnel plot for minimally adjusted study results appeared                                                                                                                                                                                                                             | No                                                                                  |

| First author | Publication date | Ref. number | Gender differences                                                                                                                                                                                                                                                          | Results from other subgroup/sensitivity analyses                                                                                                                                                                                                                                                                                                                                                                                                                                                                             | Adjustment variables of main results                                                                       | Statistical methods for pooled estimates | Publication bias assessment                                                                                           | Quality assessment of primary studies and/or evidence |
|--------------|------------------|-------------|-----------------------------------------------------------------------------------------------------------------------------------------------------------------------------------------------------------------------------------------------------------------------------|------------------------------------------------------------------------------------------------------------------------------------------------------------------------------------------------------------------------------------------------------------------------------------------------------------------------------------------------------------------------------------------------------------------------------------------------------------------------------------------------------------------------------|------------------------------------------------------------------------------------------------------------|------------------------------------------|-----------------------------------------------------------------------------------------------------------------------|-------------------------------------------------------|
|              |                  |             |                                                                                                                                                                                                                                                                             | <p>Case-control (7 studies):<br/>2.43 (1.81-3.26)</p> <p>Prospective cohort (4 studies):<br/>1.39 (1.12-1.72)</p> <p>&gt;50 hours/week or &gt;10 hours/day (5 studies): 2.37 (1.56-3.59)<br/>&lt;=50 hours/week or &lt;=10 hours/day (5 studies): 1.41 (1.14-1.74)</p> <p>No clear differences in estimates when the studies were stratified by geographic region</p>                                                                                                                                                        |                                                                                                            |                                          | symmetric and the Egger's test was not significant. No evidence of publication bias                                   |                                                       |
| Virtanen     | 2013             | 73          | <p>Sex-stratified results adjusted for age:<br/>--- Men (15 studies): 1.24 (0.98-1.57), heterogeneity: I<sup>2</sup>=43.7%<br/>--- Women (13 studies): 1.47 (1.07-2.02), heterogeneity: I<sup>2</sup>=37.3%<br/>No gender difference in multivariable-adjusted analysis</p> | <p>Multivariable adjusted (additionally adjusted SES, smoking, alcohol use, physical activity, body mass index, hypertension, hypercholesterolaemia, and diabetes) (17 studies): 1.19 (1.00-1.42), heterogeneity: I<sup>2</sup>=24.6%</p> <p>No difference according to age, national unemployment rate, welfare regime, and job insecurity measure</p>                                                                                                                                                                      | Minimally adjusted: age                                                                                    | Random effects model                     | No                                                                                                                    | No                                                    |
| Virtanen     | 2015             | 74          | <p>No gender difference</p> <p>Prospective association:<br/>--- Men: 1.11 (0.98-1.15)<br/>--- Women: 1.36 (1.10-1.68)</p>                                                                                                                                                   | <p>Cross-sectional association (alcohol use):<br/>--- unpublished studies: 1.10 (1.04-1.18), heterogeneity: I<sup>2</sup>=18%<br/>--- published studies: 1.12 (1.02-1.22), heterogeneity: I<sup>2</sup>=81%</p> <p>Prospective association:<br/>--- unpublished studies: 1.12 (1.01-1.25), heterogeneity: I<sup>2</sup>=0%<br/>--- published studies: 1.10 (0.66-1.84), heterogeneity: I<sup>2</sup>=56%</p> <p>No difference according to age, SES, geographical regions, sample type (population based vs occupational</p> | Adjusted for sex, age, SES, and ethnicity (unpublished studies) None or any adjustment (published studies) | Random effects model                     | Yes<br>The funnel plot for cross-sectional published studies appears symmetrical and Egger's test was not significant | No                                                    |

| First author                          | Publication date | Ref. number | Gender differences                                                                                                                                                                       | Results from other subgroup/sensitivity analyses                                                                                                                                                                                                                                                                                                                                                                                                                                                                                                                                   | Adjustment variables of main results                                                                                               | Statistical methods for pooled estimates | Publication bias assessment                                        | Quality assessment of primary studies and/or evidence |
|---------------------------------------|------------------|-------------|------------------------------------------------------------------------------------------------------------------------------------------------------------------------------------------|------------------------------------------------------------------------------------------------------------------------------------------------------------------------------------------------------------------------------------------------------------------------------------------------------------------------------------------------------------------------------------------------------------------------------------------------------------------------------------------------------------------------------------------------------------------------------------|------------------------------------------------------------------------------------------------------------------------------------|------------------------------------------|--------------------------------------------------------------------|-------------------------------------------------------|
|                                       |                  |             |                                                                                                                                                                                          | cohort), levels of risky alcohol use, or sample attrition rate                                                                                                                                                                                                                                                                                                                                                                                                                                                                                                                     |                                                                                                                                    |                                          |                                                                    |                                                       |
| Virtanen<br>Update of Kivimäki L 2015 | 2018             | 75          |                                                                                                                                                                                          |                                                                                                                                                                                                                                                                                                                                                                                                                                                                                                                                                                                    | Adjusted for age, sex, and SES                                                                                                     | Random effects model                     | No                                                                 | No                                                    |
| Virtanen<br>Not in the extraction     | 2005             | 76          |                                                                                                                                                                                          |                                                                                                                                                                                                                                                                                                                                                                                                                                                                                                                                                                                    | None or any adjustment                                                                                                             | Random effects model                     | No                                                                 | No                                                    |
| Virtanen                              | 2020             | 77          | Sex-stratified results:<br>--- Men (18 studies): 1.24 (1.09-1.41), heterogeneity: I <sup>2</sup> =56.4%<br>--- Women (17 studies): 1.08 (0.97-1.20), heterogeneity: I <sup>2</sup> =0.0% | Multivariable adjustment for chronic somatic disease, mental health and lifestyle (16 studies) for working hours ≥ 55 h/week: 1.12 (1.01-1.25), heterogeneity: I <sup>2</sup> =45.4%<br><br>Sensitivity analyses in which cigarette smokers, those with chronic somatic diseases, and those with underweight were excluded, had little impact on the associations.<br><br>Similar results according to age, SES, or duration of follow-up                                                                                                                                          | Adjusted for age, sex, and SES                                                                                                     | Random effects model                     | No                                                                 | No                                                    |
| Virtanen                              | 2018             | 78          | Sex-stratified results:<br>--- Men: 1.08 (0.97-1.20)<br>--- Women: 1.14 (1.00-1.29)<br>No gender difference                                                                              | A significant difference was found for Asia versus other geographic regions (p=0.034): 1.50 (1.13–2.01) for Asia, 1.11 (1.00–1.22) for Europe, 0.97 (0.70–1.34) for North America, and 0.95 (0.70–1.29) for Australia.<br><br>There were two other characteristics with subgroup differences:<br>- published vs unpublished (p-values 0.075 and 0.018 using heterogeneity test and meta-regression respectively): 1.35 (1.07-1.71) vs 1.08 (1.00-1.16),<br>- population-based vs occupational cohort (P-values 0.048 and 0.092 respectively): 1.07 (0.96-1.20) vs 1.34 (1.10-1.62) | Adjustement for age, sex, SES, and marital status (unpublished studies) and closest to that set of adjustments (published studies) | Random effects model                     | Yes<br>The Egger's test did not show evidence for publication bias | Yes<br>Cochrane risk-of-bias tool for cohort studies  |

| First author | Publication date | Ref. number | Gender differences                                                                                                                                                   | Results from other subgroup/sensitivity analyses                                                                                                                                                                                                                                                                                                                                                                                                             | Adjustment variables of main results                                                                                                                | Statistical methods for pooled estimates              | Publication bias assessment                                                                                                                                                         | Quality assessment of primary studies and/or evidence |
|--------------|------------------|-------------|----------------------------------------------------------------------------------------------------------------------------------------------------------------------|--------------------------------------------------------------------------------------------------------------------------------------------------------------------------------------------------------------------------------------------------------------------------------------------------------------------------------------------------------------------------------------------------------------------------------------------------------------|-----------------------------------------------------------------------------------------------------------------------------------------------------|-------------------------------------------------------|-------------------------------------------------------------------------------------------------------------------------------------------------------------------------------------|-------------------------------------------------------|
|              |                  |             |                                                                                                                                                                      | No difference according to age, SES, publication status, study baseline year, study quality, follow-up, response rate at baseline, loss to follow-up, outcome type, population prevalence of symptoms at baseline, and population onset of symptoms at follow-up.                                                                                                                                                                                            |                                                                                                                                                     |                                                       |                                                                                                                                                                                     |                                                       |
| Watanabe     | 2016             | 79          | Sex-stratified results:<br>--- Men (3 studies): 0.79 (0.49-1.26), heterogeneity: $I^2=0.0\%$<br>--- Women (1 study): 2.20 (1.10-4.40), heterogeneity: not applicable | Meta-analyses stratified by geographical areas indicated that the pooled RRs for Asian countries (Japan only) and for the Western countries were similar: 1.07 (0.73-1.56) and 1.05 (0.68-1.61) respectively.<br><br>In the sensitivity analysis using the overtime criteria of working 50 hours or more per week, the pooled RR was 1.24 (0.88-1.75).<br><br>Follow-up length and publication year were not significantly correlated with pooled estimates. | Adjusted for demographic covariates                                                                                                                 | Random effects model                                  | Yes<br>A funnel plot indicated a relatively smaller number of studies with greater SE (ie, with a smaller sample size) reporting greater RRs. The Egger's test was not significant. | No                                                    |
| Watanabe     | 2018             | 80          |                                                                                                                                                                      |                                                                                                                                                                                                                                                                                                                                                                                                                                                              | Adjusted by demographic variables (e.g. age, sex, education and marital status) and lifestyle variables (e.g. smoking, physical activity and sleep) | Random effects model                                  | No                                                                                                                                                                                  | Yes<br>Newcastle-Ottawa Quality Assessment Scale      |
| Wong         | 2019             | 81          | No gender differences                                                                                                                                                | Study of differences according to diagnosis method, study design, cut-off point for long working hours, working class, country of origin, and health measure                                                                                                                                                                                                                                                                                                 | None or any adjustment                                                                                                                              | Random effects model                                  | No                                                                                                                                                                                  | No                                                    |
| Xu           | 2015             | 82          | No gender difference<br><br>High-strain (gender differences: $p=0.83$ ):                                                                                             | No differences according to follow-up duration ( $< vs \geq 10$ years)<br><br>The risk of CHD-associated high-strain                                                                                                                                                                                                                                                                                                                                         | Multivariate-adjusted                                                                                                                               | Fixed effects model when no statistical heterogeneity | Yes<br>No evidence of publication bias by visual                                                                                                                                    | Yes<br>Newcastle-Ottawa Quality Assessment Scale      |

| First author | Publication date | Ref. number | Gender differences                                                                                                                                                                                                                                                                                                                                                                                                                                                                                                           | Results from other subgroup/sensitivity analyses                                                                                                                                                                                                                                                                                                                                                                                                                                                                                                                                                               | Adjustment variables of main results | Statistical methods for pooled estimates                                                    | Publication bias assessment                                                                                                                                                                                | Quality assessment of primary studies and/or evidence |
|--------------|------------------|-------------|------------------------------------------------------------------------------------------------------------------------------------------------------------------------------------------------------------------------------------------------------------------------------------------------------------------------------------------------------------------------------------------------------------------------------------------------------------------------------------------------------------------------------|----------------------------------------------------------------------------------------------------------------------------------------------------------------------------------------------------------------------------------------------------------------------------------------------------------------------------------------------------------------------------------------------------------------------------------------------------------------------------------------------------------------------------------------------------------------------------------------------------------------|--------------------------------------|---------------------------------------------------------------------------------------------|------------------------------------------------------------------------------------------------------------------------------------------------------------------------------------------------------------|-------------------------------------------------------|
|              |                  |             | <p>--- Men: 1.21 (1.04-1.40)<br/>--- Women: 1.14 (0.69-1.87)</p> <p>Passive job (gender differences: p=0.92):<br/>--- Men: 1.10 (0.91-1.34)<br/>--- Women: 1.09 (0.87-1.36)</p> <p>Active job (gender differences: p=0.81):<br/>--- Men: 1.07 (0.93-1.24)<br/>--- Women: 1.11 (0.84-1.48)</p> <p>Low control (gender differences: p=0.49):<br/>--- Men: 1.01 (0.93-1.10)<br/>--- Women: 1.14 (0.81-1.60)</p> <p>High demands (gender differences: p=0.38):<br/>--- Men: 1.12 (0.94-1.33)<br/>--- Women: 1.02 (0.90-1.14)</p> | <p>jobs was increased in studies with adequate adjustment of confounders (RR 1.18, 95% CI 1.04–1.34) and was much more pronounced in those with inadequate adjustment (RR 1.66, 95% CI 1.27–2.16).<br/>Adequate adjustment was defined as adjustment of at least 5 of 7 factors among age, sex, diabetes mellitus or other measure of blood glucose, BMI or other measure of overweight/obesity, cholesterol, smoking, and hypertension/blood pressure.<br/>Sensitivity analyses confirmed that the results were not influenced by the use of fixed-effect or random-effects model, or ORs rather than RRs</p> |                                      | <p>between studies (P&gt;0.10 and I<sup>2</sup>&lt;50%), otherwise random-effects model</p> | <p>inspection of the funnel plots or by using Egger's test</p>                                                                                                                                             | <p>All studies were graded as good quality</p>        |
| Yang         | 2019             | 83          | <p>Subgroup analyses according to gender (any cancer):<br/>Men: 1.25 (1.14–1.37), I<sup>2</sup>=7.3%<br/>Women: 1.03 (0.92–1.16), I<sup>2</sup>= 0.0%</p>                                                                                                                                                                                                                                                                                                                                                                    | <p>Subgroup analyses according to study design, study location, cancer site, smoking, drinking, body mass index, and physical activity</p>                                                                                                                                                                                                                                                                                                                                                                                                                                                                     | Any adjustment                       | Random effects model                                                                        | No                                                                                                                                                                                                         | Yes<br>Newcastle-Ottawa Quality Assessment Scale      |
| Yang         | 2018             | 84          |                                                                                                                                                                                                                                                                                                                                                                                                                                                                                                                              | <p>For those meta-analyses showing between-studies heterogeneity, subgroup analyses were performed and showed differences according to study design:</p> <p>--- effort-reward balance prospective (2 studies):<br/>1.93 (1.48-2.52)<br/>cross-sectional (3 studies):<br/>1.35 (1.28-1.43)<br/>p-value for difference=0.02</p> <p>--- work-family conflict prospective (6 studies):</p>                                                                                                                                                                                                                         |                                      | <p>Fixed or random effects model according to heterogeneity between studies</p>             | <p>Yes<br/>Based on Begg's test, no publication was detected, although certain asymmetrical funnel plots were observed. Egger's test indicated that publication bias may be apparent for effort-reward</p> | No                                                    |

| First author | Publication date | Ref. number | Gender differences                                                                                                                                                | Results from other subgroup/sensitivity analyses                                                                                                                                                                                                                                                                                                                                                                                                                                                                                                                                                                                                                                                                                                                                                                                                                                                                               | Adjustment variables of main results | Statistical methods for pooled estimates | Publication bias assessment                                                                                                                                                                               | Quality assessment of primary studies and/or evidence                                                                             |
|--------------|------------------|-------------|-------------------------------------------------------------------------------------------------------------------------------------------------------------------|--------------------------------------------------------------------------------------------------------------------------------------------------------------------------------------------------------------------------------------------------------------------------------------------------------------------------------------------------------------------------------------------------------------------------------------------------------------------------------------------------------------------------------------------------------------------------------------------------------------------------------------------------------------------------------------------------------------------------------------------------------------------------------------------------------------------------------------------------------------------------------------------------------------------------------|--------------------------------------|------------------------------------------|-----------------------------------------------------------------------------------------------------------------------------------------------------------------------------------------------------------|-----------------------------------------------------------------------------------------------------------------------------------|
|              |                  |             |                                                                                                                                                                   | <p>1.83 (1.51-2.21)<br/>cross-sectional (2 studies):<br/>4.88 (3.59-6.64)<br/>p-value for difference&lt;0.01</p> <p>No difference according to method of outcome measurement (standard scale vs nonstandard questionnaire) and study location (Europe vs Asia)</p>                                                                                                                                                                                                                                                                                                                                                                                                                                                                                                                                                                                                                                                             |                                      |                                          | <p>imbalance (p=0.04), low social support (p=0.02), and work-family conflict (p=0.03)</p>                                                                                                                 |                                                                                                                                   |
| Zhu          | 2020             | 85          | <p>--- Men: 1.17 (1.05-1.32), heterogeneity: I<sup>2</sup>=68.9%<br/>--- Women: 1.11 (1.01-1.21), heterogeneity: I<sup>2</sup>=61.8%<br/>No gender difference</p> | <p>No difference according to study design<br/>Cohort (8 studies): 1.12 (1.00-1.25), heterogeneity: I<sup>2</sup>=71.0%<br/>Cross-sectional (21 studies): 1.14 (1.06-1.21), heterogeneity: I<sup>2</sup>=77.6%</p> <p>No difference according to outcome<br/>BMI ≥ 25 kg/m<sup>2</sup>: 1.07 (1.00-1.14), heterogeneity: I<sup>2</sup>=69.1%<br/>BMI ≥ 30 kg/m<sup>2</sup>: 1.23 (1.09-1.39), heterogeneity: I<sup>2</sup>=80.8%<br/>Weight gain/BMI increase: 1.19 (1.02-1.40), heterogeneity: I<sup>2</sup>=74.8%</p> <p>No differences according to location, occupation, exposure definition, and study quality</p> <p>Similar results when including only the results of studies whose participants excluded part-time workers (defined as &lt;35 hours per week): 1.13 (1.04-1.22)<br/>Excluding 5 studies that did not adjust for any confounding factors did not substantially alter results:<br/>1.15 (1.08-1.23)</p> | None or any adjustment               | Random effects model                     | <p>Yes<br/>Visual inspection of the funnel plot showed asymmetry. Begg's test (p=0.035) and Egger's test (p&lt;0.001) suggested that there existed significant evidence of potential publication bias</p> | <p>Yes<br/>National Institutes of Health (NIH)'s Quality Assessment Tool for Observational Cohort and Cross-Sectional Studies</p> |

IPD-Work consortium studies with literature review were underlined in orange and those without literature review were underlined in yellow

Supplementary Table S2. Quality assessment of the included reviews

| First author                          | Journal | Publication date | Reference number | Quality assessment of reviews (see Appendix 2) | Overall score for quality assessment of reviews (/16) |
|---------------------------------------|---------|------------------|------------------|------------------------------------------------|-------------------------------------------------------|
| Amiri                                 | PH      | 2020             | 14               | ● ● ○ ● ● ○ ● ●                                | 11                                                    |
| Aronsson<br>Not in the extraction     | BMC PH  | 2017             | 15               | ● ● ● ● ● ○ ○ ○                                | 6                                                     |
| Babu                                  | OEM     | 2014             | 16               | ● ● ○ ● ● ○ ● ●                                | 8                                                     |
| Bonde                                 | SJWEH   | 2013             | 17               | ● ○ ○ ● ● ● ● ●                                | 6                                                     |
| Bonzini                               | OEM     | 2007             | 18               | ● ○ ○ ● ● ● ● ●                                | 7                                                     |
| Cai                                   | AJOG    | 2019             | 19               | ● ○ ○ ● ● ● ● ●                                | 10                                                    |
| Cosgrove                              | OM      | 2012             | 20               | ● ○ ○ ● ● ○ ● ○                                | 6                                                     |
| Descatha                              | EI      | 2020             | 21               | ● ● ● ● ● ● ● ●                                | 13                                                    |
| Dragano                               | E       | 2017             | 22               | ∅ ● ● ∅ ● ● ● ∅                                | 16*                                                   |
| Duchaine                              | JAMAP   | 2020             | 23               | ● ● ● ● ● ○ ● ●                                | 11                                                    |
| Ferrie                                | CMAJ    | 2016             | 24               | ∅ ● ● ∅ ● ● ● ∅                                | 16*                                                   |
| Fransson                              | AJE     | 2012             | 25               | ∅ ● ● ∅ ● ● ● ∅                                | 12.8*                                                 |
| Fransson                              | S       | 2015             | 26               | ∅ ● ● ∅ ● ○ ● ∅                                | 11.2*                                                 |
| Hauke                                 | WS      | 2011             | 27               | ● ● ○ ● ● ○ ○ ○                                | 6                                                     |
| Heikkila<br>Not in the extraction     | BJC     | 2016             | 28               | ∅ ● ● ∅ ● ○ ● ∅                                | 11.2*                                                 |
| Heikkila                              | BMJ     | 2013             | 29               | ∅ ● ● ∅ ● ○ ● ∅                                | 11.2*                                                 |
| Heikkila                              | JAHA    | 2020             | 30               | ∅ ● ● ∅ ● ● ● ∅                                | 14.4*                                                 |
| Heikkila                              | PO      | 2012             | 31               | ∅ ● ● ∅ ● ● ● ∅                                | 14.4*                                                 |
| Heikkila                              | PO      | 2012             | 32               | ∅ ● ● ∅ ● ● ● ∅                                | 14.4*                                                 |
| Heikkila                              | PO      | 2014             | 33               | ∅ ● ● ∅ ● ○ ● ∅                                | 11.2*                                                 |
| Huang                                 | N       | 2015             | 34               | ● ● ○ ● ● ● ● ●                                | 12                                                    |
| Kang                                  | JOEM    | 2012             | 35               | ● ● ○ ○ ● ○ ● ●                                | 8                                                     |
| Kim                                   | IAOEH   | 2016             | 36               | ● ● ○ ○ ● ○ ● ●                                | 9                                                     |
| Kivimaki                              | CMAJ    | 2013             | 37               | ∅ ● ● ∅ ● ○ ○ ∅                                | 8*                                                    |
| Kivimaki<br>Update of Kivimaki E 2014 | CCR     | 2015             | 38               | ● ● ○ ○ ○ ○ ○ ○                                | 3                                                     |
| Kivimaki<br>Idem Steptoe ARPH 2013    | E       | 2014             | 39               | ● ● ○ ○ ○ ○ ● ○                                | 5                                                     |
| Kivimaki<br>Not in the extraction     | E       | 2018             | 40               | ∅ ● ● ∅ ● ○ ○ ∅                                | 9.6*                                                  |
| Kivimaki                              | EJH     | 2017             | 41               | ∅ ● ● ∅ ● ● ● ∅                                | 16*                                                   |
| Kivimaki                              | IJO     | 2015             | 42               | ● ● ● ○ ● ○ ● ○                                | 9                                                     |
| Kivimaki                              | L       | 2012             | 43               | ∅ ● ● ∅ ● ● ● ∅                                | 16*                                                   |
| Kivimaki                              | L       | 2015             | 44               | ● ● ● ● ● ● ● ●                                | 15                                                    |
| Kivimaki                              | LDE     | 2015             | 45               | ● ● ● ● ○ ● ● ●                                | 12                                                    |
| Kivimaki                              | SJWEH   | 2006             | 46               | ● ● ● ○ ● ○ ● ●                                | 7                                                     |
| Kraatz                                | IAOEH   | 2013             | 47               | ● ● ○ ● ● ○ ● ○                                | 8                                                     |
| Lang                                  | SSM     | 2012             | 48               | ● ● ○ ● ● ○ ● ●                                | 8                                                     |
| Li                                    | EI      | 2020             | 49               | ● ● ● ● ● ● ● ●                                | 13                                                    |
| Linton<br>Not in the extraction       | SMR     | 2015             | 50               | ● ● ○ ● ● ○ ○ ○                                | 6                                                     |

| First author                                                      | Journal | Publication date | Reference number | Quality assessment of reviews (see Appendix 2) | Overall score for quality assessment of reviews (/16) |
|-------------------------------------------------------------------|---------|------------------|------------------|------------------------------------------------|-------------------------------------------------------|
| Madsen                                                            | PM      | 2017             | 51               | ● ● ○ ○ ● ● ● ○                                | 12                                                    |
| Magnavita                                                         | FN      | 2019             | 52               | ● ○ ○ ○ ● ○ ● ●                                | 7                                                     |
| Milner                                                            | OEM     | 2018             | 53               | ● ○ ○ ○ ● ● ● ●                                | 7                                                     |
| Milner                                                            | JECH    | 2019             | 54               | ● ● ○ ○ ● ● ● ●                                | 10                                                    |
| Nielsen                                                           | SMR     | 2020             | 55               | ● ○ ○ ○ ○ ● ● ●                                | 7                                                     |
| Nieuwenhuijsen                                                    | OM      | 2010             | 56               | ○ ● ○ ○ ● ● ○ ○                                | 6                                                     |
| Nyberg                                                            | DC      | 2014             | 57               | ∅ ● ● ∅ ● ● ● ∅                                | 14.4*                                                 |
| Nyberg                                                            | JIM     | 2012             | 58               | ∅ ● ● ∅ ● ● ○ ∅                                | 11.2*                                                 |
| Nyberg                                                            | PO      | 2013             | 59               | ∅ ○ ● ∅ ● ● ○ ∅                                | 6.4*                                                  |
| Palmer<br>Not in the extraction                                   | OEM     | 2013             | 60               | ○ ○ ○ ○ ● ● ○ ○                                | 6                                                     |
| Rönblad                                                           | SJWEH   | 2019             | 61               | ● ● ● ● ● ○ ● ●                                | 12                                                    |
| Rudkjoebing                                                       | SJWEH   | 2020             | 62               | ● ○ ● ● ● ○ ● ●                                | 10                                                    |
| Rugulies                                                          | SJWEH   | 2017             | 63               | ● ● ○ ● ● ○ ● ●                                | 9                                                     |
| Stansfeld                                                         | SJWEH   | 2006             | 64               | ● ● ○ ○ ● ● ● ○                                | 8                                                     |
| Steptoe<br>Not in the extraction<br>Update of Kivimäki SJWEH 2006 | NRC     | 2012             | 65               | ○ ● ● ○ ● ○ ● ○                                | 8                                                     |
| Sui                                                               | PO      | 2016             | 66               | ● ● ○ ○ ● ● ● ● ●                              | 11                                                    |
| Szerencsi                                                         | SJWEH   | 2012             | 67               | ○ ○ ○ ○ ● ○ ○ ●                                | 5                                                     |
| Taouk                                                             | SJWEH   | 2020             | 68               | ● ● ○ ○ ● ● ● ●                                | 11                                                    |
| Theorell<br>Not in the extraction                                 | BMC PH  | 2015             | 69               | ○ ● ● ● ● ○ ○ ●                                | 7                                                     |
| van der Molen<br>Update of Nieuwenhuijsen OM 2010                 | BMJO    | 2020             | 70               | ● ● ○ ● ● ● ● ●                                | 13                                                    |
| Van Melick                                                        | IAOEH   | 2014             | 71               | ● ○ ○ ○ ● ● ● ○                                | 7                                                     |
| Virtanen                                                          | AJE     | 2012             | 72               | ● ○ ● ○ ● ○ ● ●                                | 8                                                     |
| Virtanen                                                          | BMJ     | 2013             | 73               | ● ● ● ○ ● ● ● ○                                | 11                                                    |
| Virtanen                                                          | BMJ     | 2015             | 74               | ● ● ○ ○ ● ● ● ●                                | 11                                                    |
| Virtanen<br>Update of Kivimäki L 2015                             | CCR     | 2018             | 75               | ● ● ● ○ ● ○ ● ○                                | 10                                                    |
| Virtanen<br>Not in the extraction                                 | IJE     | 2005             | 76               | ○ ○ ○ ○ ● ○ ● ○                                | 4                                                     |
| Virtanen                                                          | IJO     | 2020             | 77               | ∅ ● ● ∅ ● ● ● ∅                                | 14.4*                                                 |
| Virtanen                                                          | SJWEH   | 2018             | 78               | ● ● ○ ● ● ● ● ●                                | 13                                                    |
| Watanabe                                                          | OEM     | 2016             | 79               | ● ● ○ ○ ● ● ● ●                                | 11                                                    |
| Watanabe                                                          | OR      | 2018             | 80               | ● ● ○ ● ● ○ ○ ○                                | 7                                                     |
| Wong                                                              | IJERPH  | 2019             | 81               | ○ ○ ○ ○ ● ● ○ ○                                | 5                                                     |
| Xu                                                                | AM      | 2015             | 82               | ● ● ○ ○ ● ● ● ●                                | 12                                                    |
| Yang                                                              | IJC     | 2019             | 83               | ● ● ○ ○ ● ● ● ○                                | 10                                                    |
| Yang                                                              | SB      | 2018             | 84               | ● ○ ○ ○ ● ○ ● ●                                | 6                                                     |
| Zhu                                                               | OR      | 2020             | 85               | ● ○ ○ ○ ● ● ● ●                                | 9                                                     |

IPD-Work consortium studies with literature review were underlined in orange and those without literature review were underlined in yellow

Supplementary Table S3. Full-text articles excluded and reason for exclusion

| Full-text articles excluded (first author, publication year, ref number) | Reason for exclusion |
|--------------------------------------------------------------------------|----------------------|
| Alarcon 2011 (1)                                                         | 3                    |
| Cantisano 2008 (2)                                                       | 2                    |
| Chan 2008(3)                                                             | 2                    |
| Cheng 2008 (4)                                                           | 2                    |
| Crawford 2010 (5)                                                        | 3                    |
| Eddy 2016 (6)                                                            | 3                    |
| Eddy 2017 (7)                                                            | 3                    |
| Eddy 2018 (8)                                                            | 3                    |
| Eijkelhof 2013 (9)                                                       | 2                    |
| Heikkilä 2013 (10)                                                       | 2                    |
| Jiang 2018 (11)                                                          | 3                    |
| Kivimäki 2015 (12)                                                       | 1                    |
| Landsbergis 2013 (13)                                                    | 3                    |
| Litwiller 2017 (14)                                                      | 3                    |
| Llosa 2018 (15)                                                          | 3                    |
| Montano 2017 (16)                                                        | 3                    |
| Nielsen 2012 (17)                                                        | 3                    |
| Nielsen 2014 (18)                                                        | 2                    |
| Nielsen 2015 (19)                                                        | 3                    |
| Nixon 2011 (20)                                                          | 3                    |
| Park 2009 (21)                                                           | 3                    |
| Park 2016 (22)                                                           | 3                    |
| Reichl 2014 (23)                                                         | 3                    |
| Schmidt 2014 (24)                                                        | 3                    |
| Sverke 2002 (25)                                                         | 2                    |
| Verkuil 2015 (26)                                                        | 3                    |
| Willness 2007 (27)                                                       | 3                    |

1. neither a literature review, nor a IPD-Work study (n = 1)

2. no or unspecified health outcome (n = 7)

3. RR, HR or OR summary estimates not provided (n = 19)

## References

1. Alarcon GM. A meta-analysis of burnout with job demands, resources, and attitudes. *Journal of Vocational Behavior*. 2011;79(2):549-62.
2. Cantisano GT, Domínguez JFM, Depolo M, Howard VN. Perceived sexual harassment at work: Meta-analysis and structural model of antecedents and consequences. *The Spanish Journal of Psychology*. 2008;11(1):207-18.
3. Chan DK-S, Lam CB, Chow SY, Cheung SF. Examining the Job-Related, Psychological, and Physical Outcomes of Workplace Sexual Harassment: A Meta-Analytic Review. *Psychology of Women Quarterly*. 2008;32(4):362-76.
4. Cheng GH-L, Chan DK-S. Who suffers more from job insecurity? A meta-analytic review. *Applied Psychology*. 2008;57(2):272-303.

5. Crawford ER, LePine JA, Rich BL. Linking Job Demands and Resources to Employee Engagement and Burnout: A Theoretical Extension and Meta-Analytic Test. *Journal of Applied Psychology*. 2010;95(5):834-48.
6. Eddy P, Heckenberg R, Wertheim EH, Kent S, Wright BJ. A systematic review and meta-analysis of the effort-reward imbalance model of workplace stress with indicators of immune function. *Journal of Psychosomatic Research*. 2016;91:1-8.
7. Eddy P, Wertheim EH, Kingsley M, Wright BJ. Associations between the effort-reward imbalance model of workplace stress and indices of cardiovascular health: A systematic review and meta-analysis. *Neurosci Biobehav Rev*. 2017;83:252-66.
8. Eddy P, Wertheim EH, Hale MW, Wright BJ. A Systematic Review and Meta-analysis of the Effort-Reward Imbalance Model of Workplace Stress and Hypothalamic-Pituitary-Adrenal Axis Measures of Stress. *Psychosom Med*. 2018;80(1):103-13.
9. Eijkelhof BHW, Huysmans MA, Garza JLB, Blatter BM, van Dieen JH, Dennerlein JT, et al. The effects of workplace stressors on muscle activity in the neck-shoulder and forearm muscles during computer work: a systematic review and meta-analysis. *European Journal of Applied Physiology*. 2013;113(12):2897-912.
10. Heikkila K, Fransson EI, Nyberg ST, Zins M, Westerlund H, Westerholm P, et al. Job strain and health-related lifestyle: findings from an individual-participant meta-analysis of 118,000 working adults. *Am J Public Health*. 2013;103(11):2090-7.
11. Jiang L, Lavaysse LM. Cognitive and Affective Job Insecurity: A Meta-Analysis and a Primary Study. *Journal of Management*. 2018;44(6):2307-42.
12. Kivimaki M, Singh-Manoux A, Virtanen M, Ferrie JE, Batty GD, Rugulies R. IPD-Work consortium: pre-defined meta-analyses of individual-participant data strengthen evidence base for a link between psychosocial factors and health. *Scand J Work Environ Health*. 2015;41(3):312-21.
13. Landsbergis PA, Dobson M, Koutsouras G, Schnall P. Job strain and ambulatory blood pressure: a meta-analysis and systematic review. *Am J Public Health*. 2013;103(3):e61-71.
14. Litwiller B, Snyder LA, Taylor WD, Steele LM. The relationship between sleep and work: A meta-analysis. *The Journal of Applied Psychology*. 2017;102(4):682-99.
15. Llosa JA, Menendez-Espina S, Agullo-Tomas E, Rodriguez-Suarez J. Job insecurity and mental health: A meta-analytical review of the consequences of precarious work in clinical disorders. *Anales De Psicologia*. 2018;34(2):211-23.
16. Montano D, Reeske A, Franke F, Huffmeier J. Leadership, followers' mental health and job performance in organizations: A comprehensive meta-analysis from an occupational health perspective. *Journal of Organizational Behavior*. 2017;38(3):327-50.
17. Nielsen MB, Einarsen S. Outcomes of exposure to workplace bullying: A meta-analytic review. *Work and Stress*. 2012;26(4):309-32.
18. Nielsen MB, Magerøy N, Gjerstad J, Einarsen S. Workplace bullying and subsequent health problems. *Tidsskr Nor Laegeforen*. 2014;134(12-13):1233-8.
19. Nielsen MB, Tangen T, Idsoe T, Matthiesen SB, Magerøy N. Post-traumatic stress disorder as a consequence of bullying at work and at school A literature review and meta-analysis. *Aggression and Violent Behavior*. 2015;21:17-24.
20. Nixon AE, Mazzola JJ, Bauer J, Krueger JR, Spector PE. Can work make you sick? A meta-analysis of the relationships between job stressors and physical symptoms. *Work and Stress*. 2011;25(1):1-22.
21. Park HI, Baiden M, Jacob AC, Wagner SH, editors. Job control and burnout: A meta-analytic test of the Conservation of Resources model 2009 2009: Academy of Management (Acad. Manage. Annu. Meet.: Green Manage. Matters, AOM).

22. Park HI, Jacob AC, Wagner SH, Baiden M. Job control and burnout: A meta-analytic test of the conservation of resources model. *Applied Psychology*. 2016;63(4):607-42.
23. Reichl C, Leiter MP, Spinath FM. Work-nonwork conflict and burnout: A meta-analysis. *Human Relations*. 2014;67(8):979-1005.
24. Schmidt S, Roesler U, Kusserow T, Rau R. Uncertainty in the workplace: Examining role ambiguity and role conflict, and their link to depression—a meta-analysis. *European Journal of Work and Organizational Psychology*. 2014;23(1):91-106.
25. Sverke M, Hellgren J, Naswall K. No security: a meta-analysis and review of job insecurity and its consequences. *J Occup Health Psychol*. 2002;7(3):242-64.
26. Verkuil B, Atasayi S, Molendijk ML. Workplace Bullying and Mental Health: A Meta-Analysis on Cross-Sectional and Longitudinal Data. *PLoS One*. 2015;10(8):e0135225.
27. Willness CR, Steel P, Lee K. A meta-analysis of the antecedents and consequences of workplace sexual harassment. *Personnel Psychology*. 2007;60(1):127-62.
